# Supplementary material for: Photoresponsive behavior of hydrophilic/hydrophobic-based novel azobenzene mesogens: synthesis, characterization and their application in optical storage devices
Source: Royal Society of Chemistry journal article supplement (doi:10.1039/c9ra08211e), 2019-01-01
Supplement: c9ra08211e1.pdf [file c9ra08211e1.pdf]

## Supplementary Information

# Photoresponsive behaviour of hydrophilic/hydrophobic based novel azobenzene mesogen: Synthesis, characterization and their application in optical storage devices

Sunil B N<sup>a,b</sup>, Wan Sinn Yam<sup>c\*\*</sup>, Gurumurthy Hegde<sup>a\*</sup>

<sup>a</sup>Center for Nano-materials and Displays, BMS R and D Centre,

B.M.S. College of Engineering, Bangalore, India 560019

<sup>b</sup>Department of Chemistry, B.M.S. College of Engineering, Bangalore, India 560019

<sup>c</sup>School of Chemical Sciences, Universiti Sains Malaysia, Penang, Malaysia, 11800

Corresponding authors: \*[murthyhegde@gmail.com](mailto:murthyhegde@gmail.com) \*\*[wansinn@usm.my](mailto:wansinn@usm.my)

### 1. <sup>1</sup>H NMR & <sup>13</sup>C NMR graphs

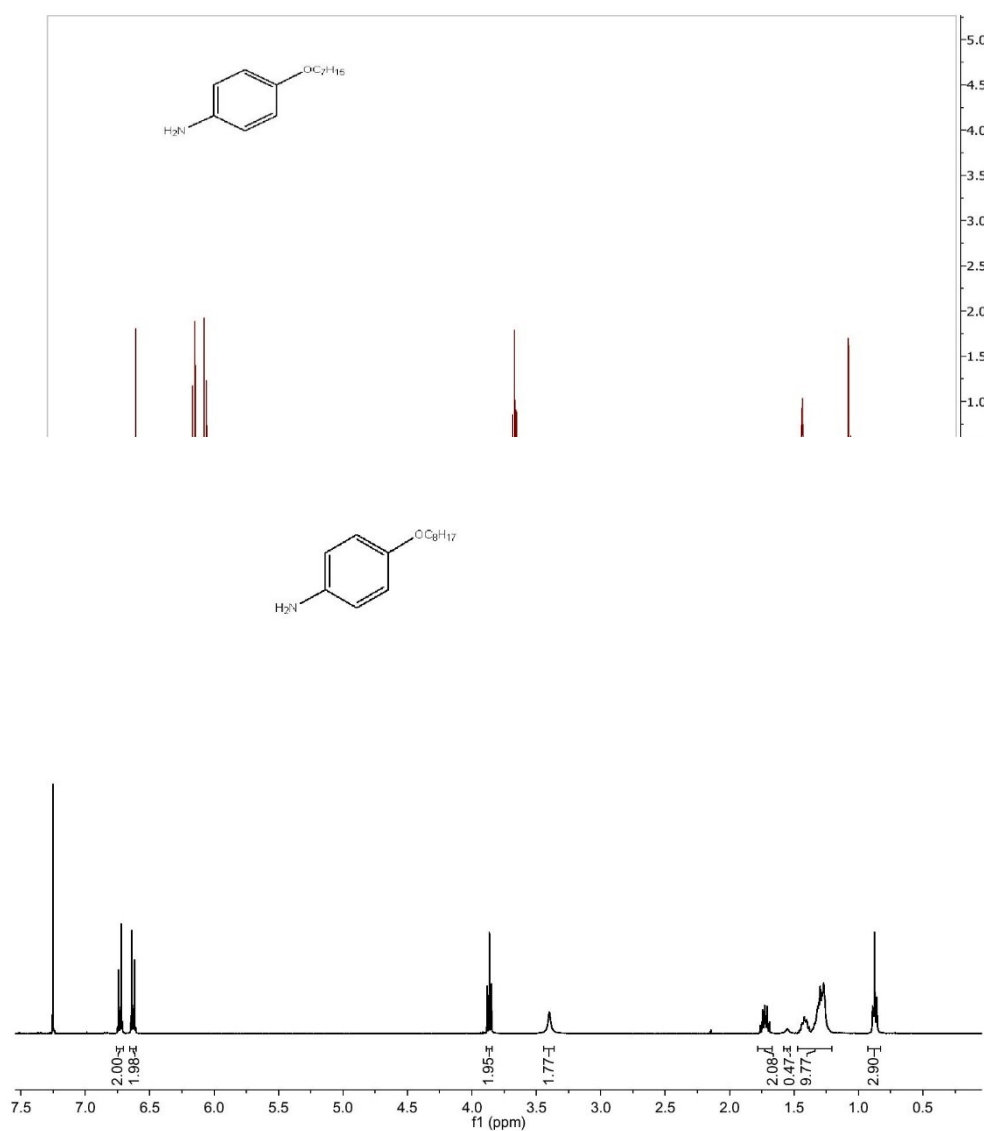

**Fig. S1** <sup>1</sup>H  
NMR  
graph of  
compound  
d 4.

Fig. S2  $^1\text{H}$  NMR graph of compound 5.

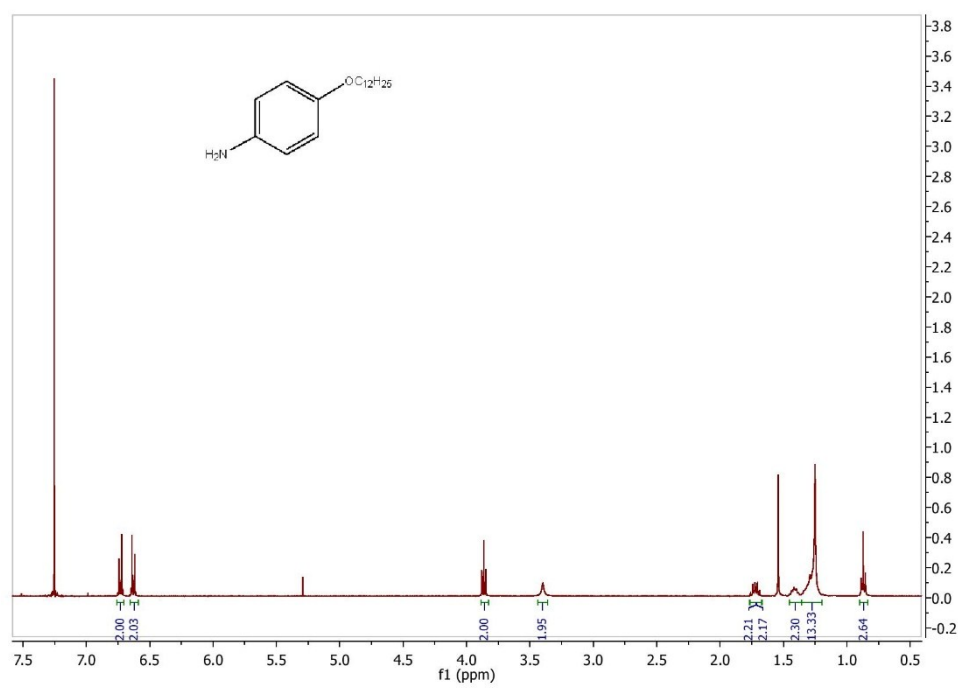

Fig. S3  $^1\text{H}$  NMR graph of compound 6.

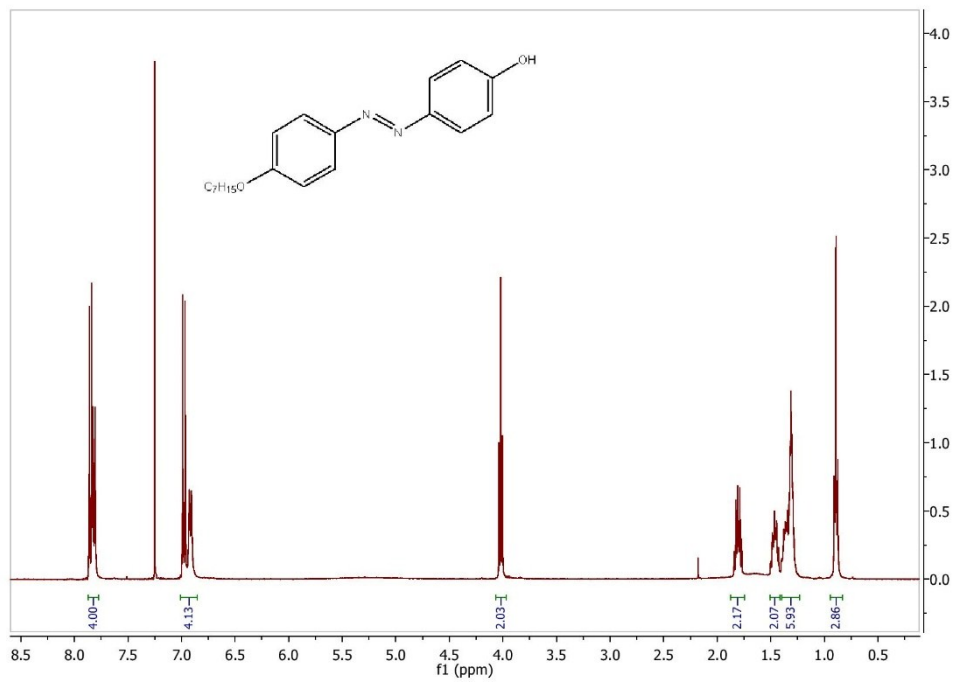

Fig. S4  $^1\text{H}$  NMR graph of compound 7.

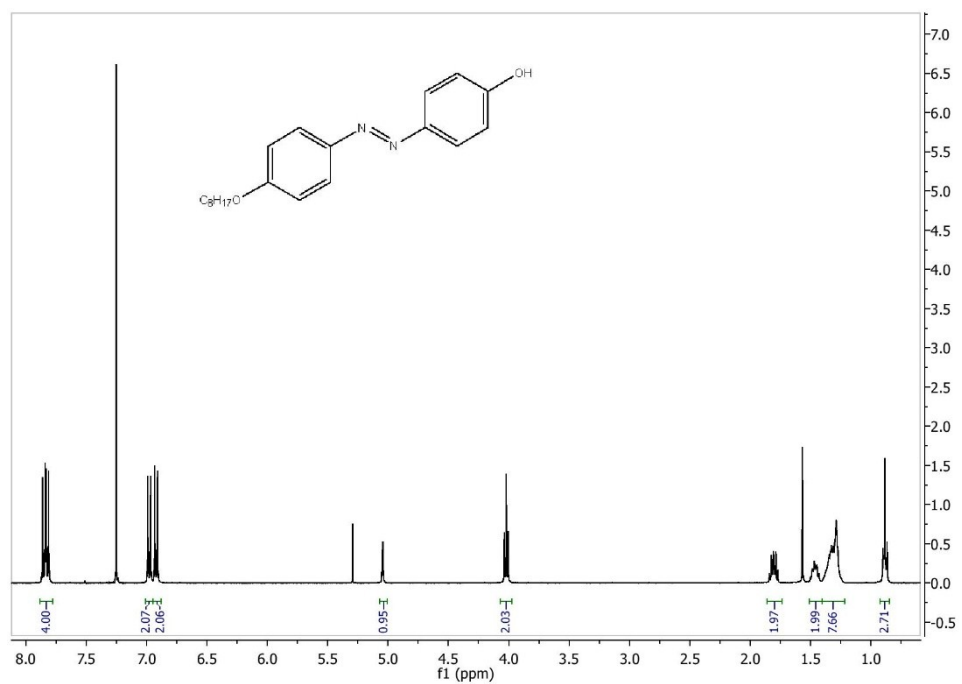

Fig. S5  $^1\text{H}$  NMR graph of compound 8.

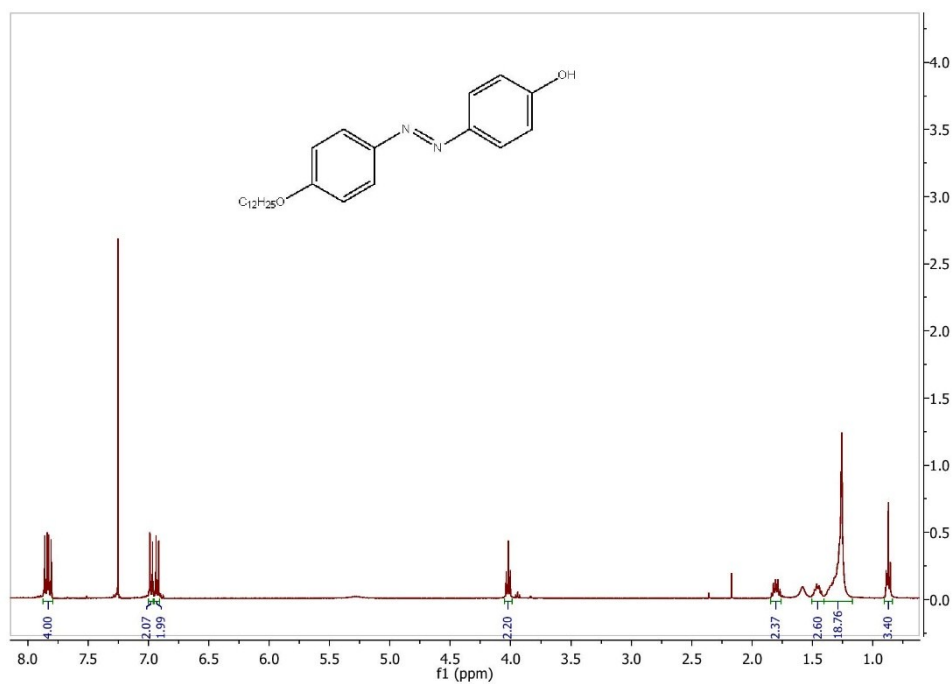

Fig. S6 <sup>1</sup>H NMR graph of compound 9.

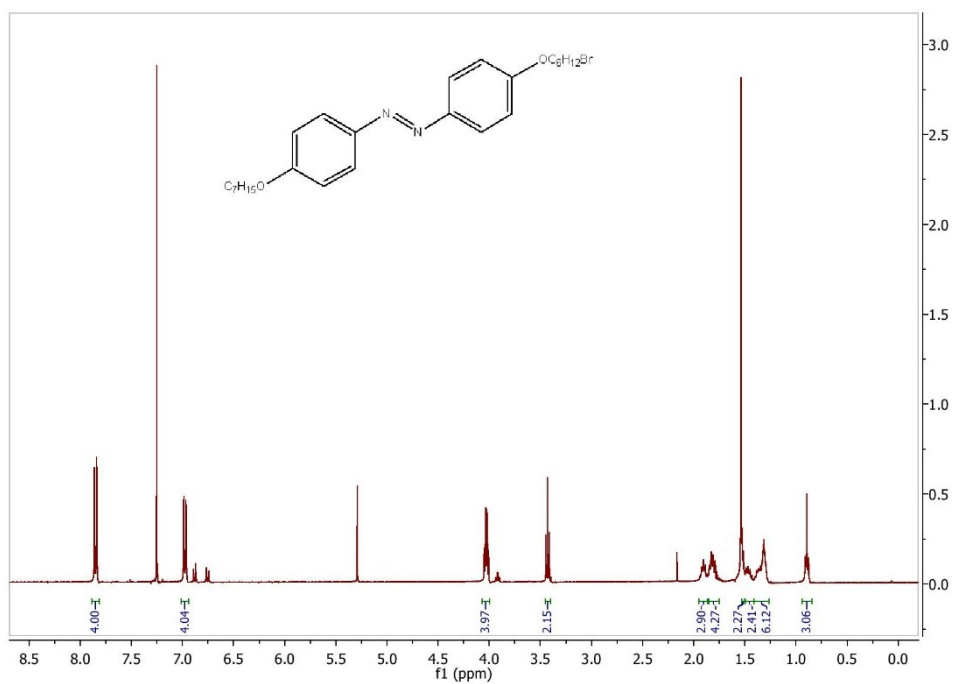

Fig. S7 <sup>1</sup>H NMR graph of compound 10.

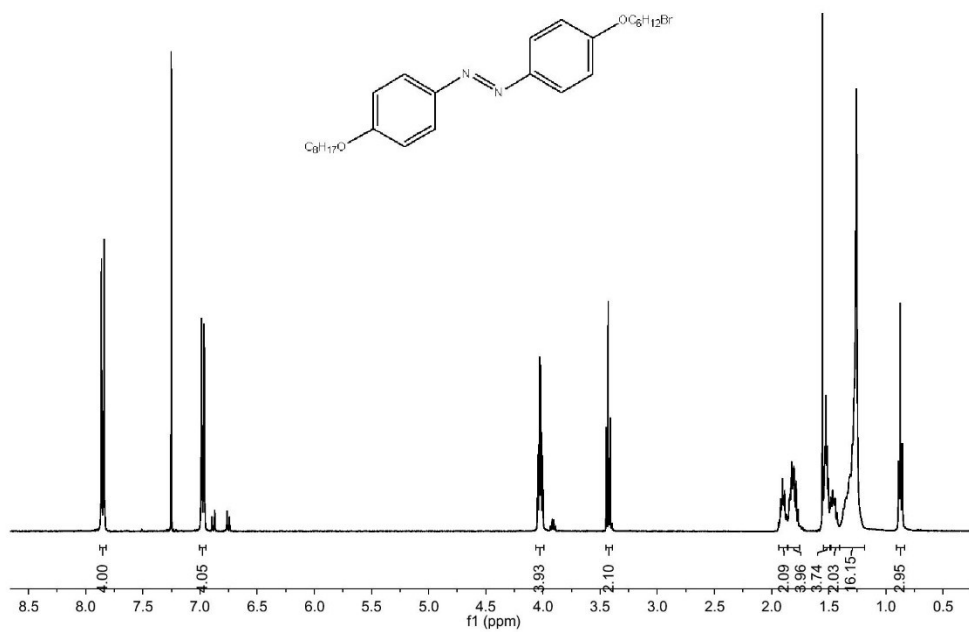

Fig. S8 <sup>1</sup>H NMR graph of compound 11.

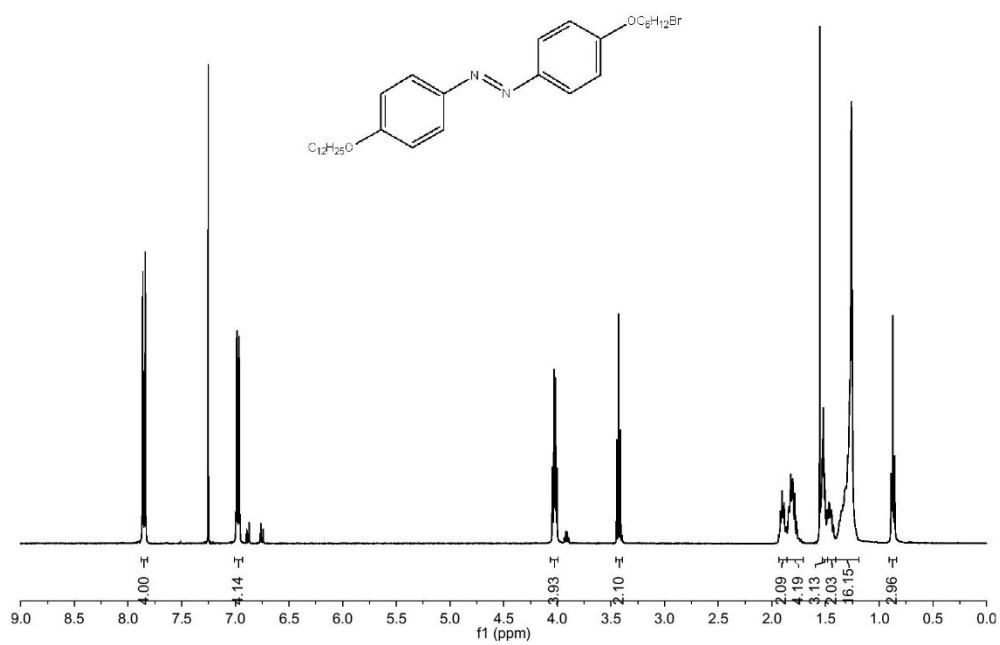

Fig. S9 <sup>1</sup>H NMR graph of compound 12.

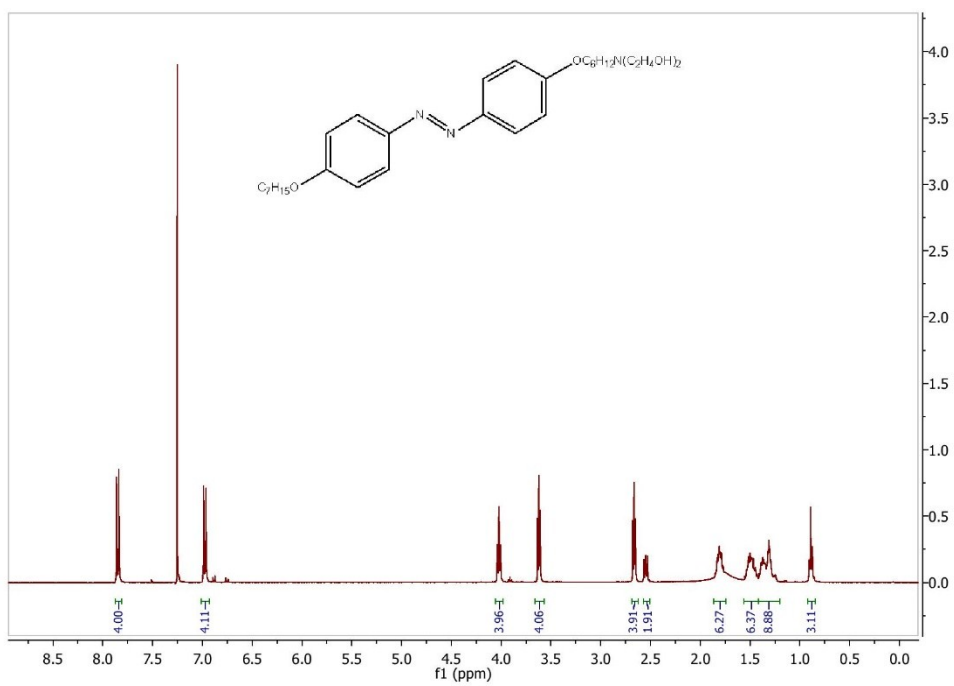

Fig. S10  $^1\text{H}$  NMR graph of compound 13.

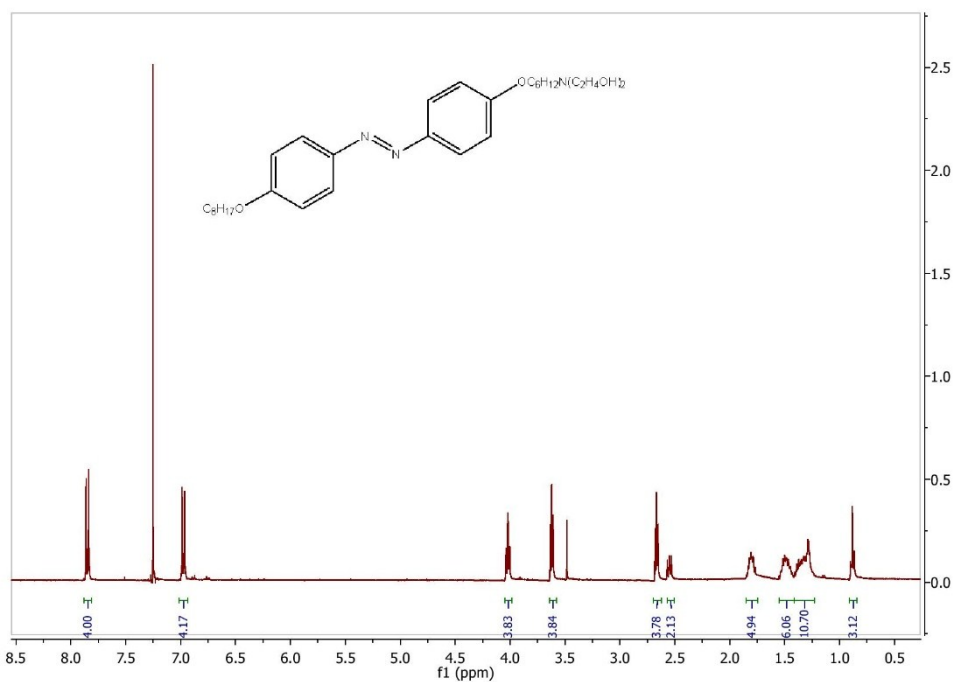

Fig. S11  $^1\text{H}$  NMR graph of compound 14.

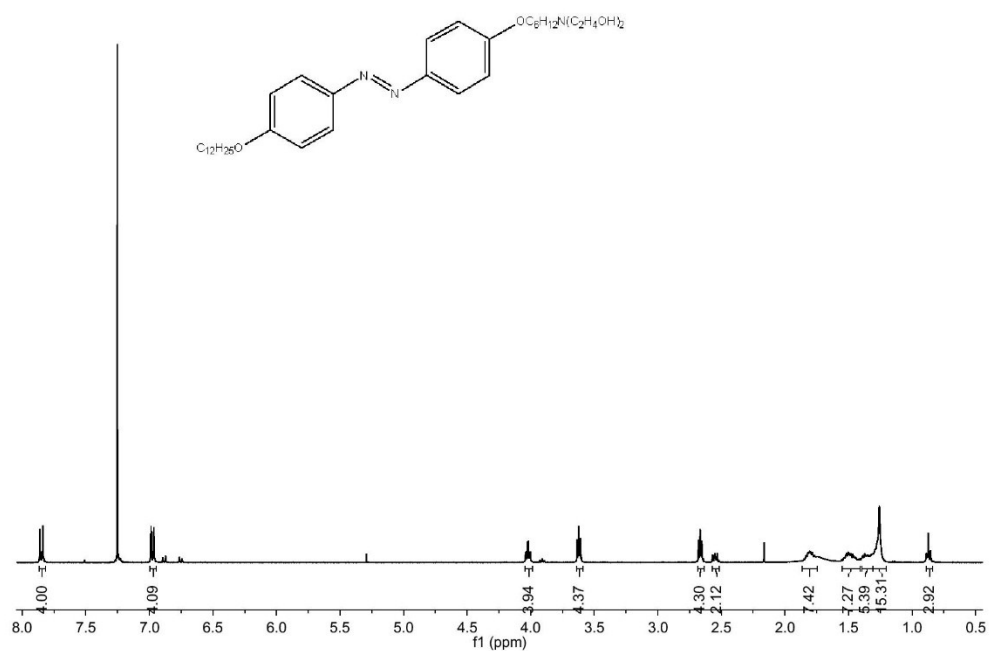

Fig. S12 <sup>1</sup>H NMR graph of compound 15.

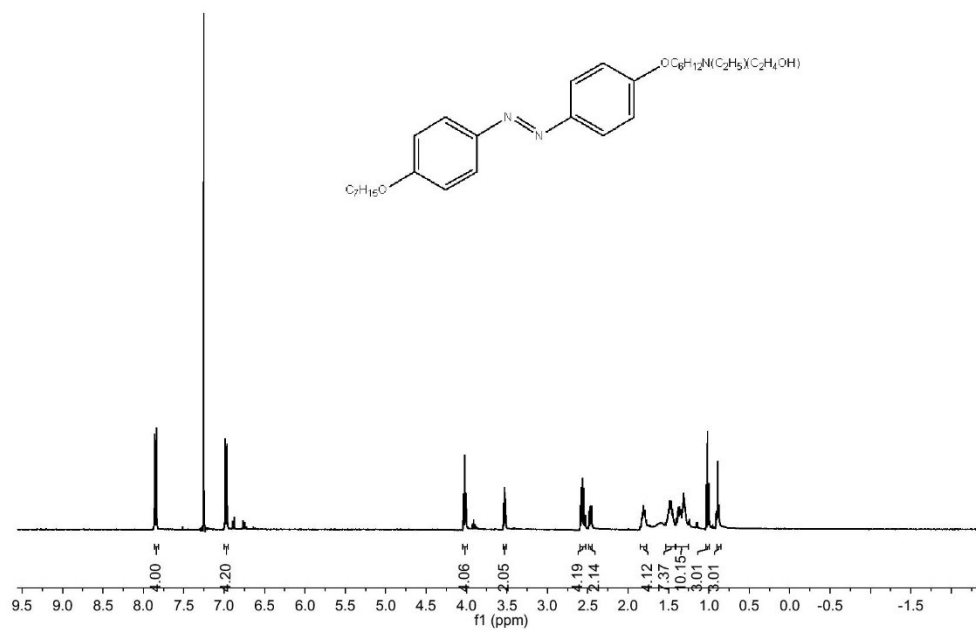

Fig. S13 <sup>1</sup>H NMR graph of compound 16.

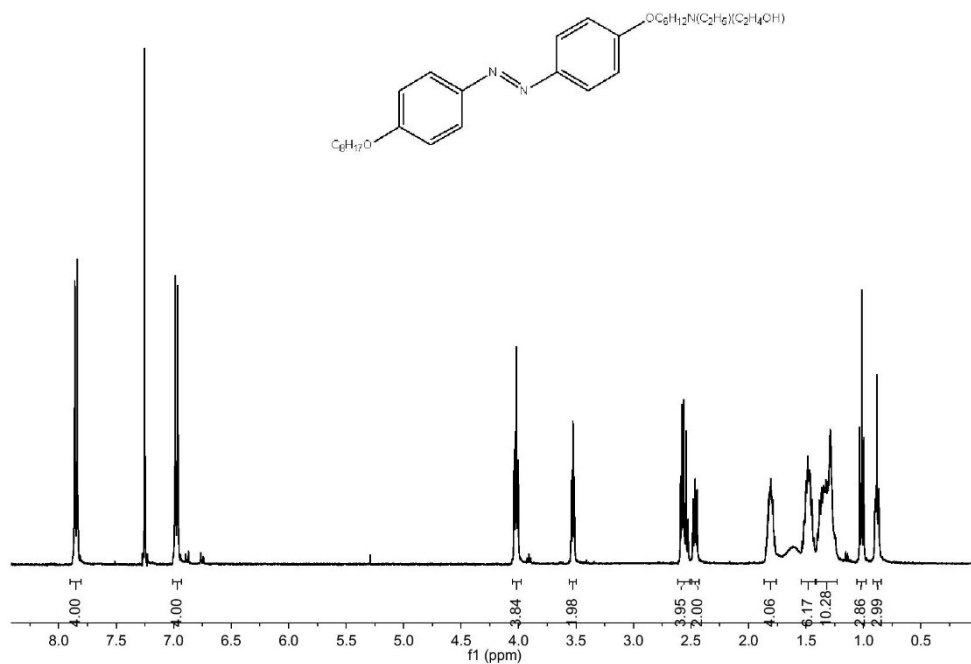

Fig. S14 <sup>1</sup>H NMR graph of compound 17.

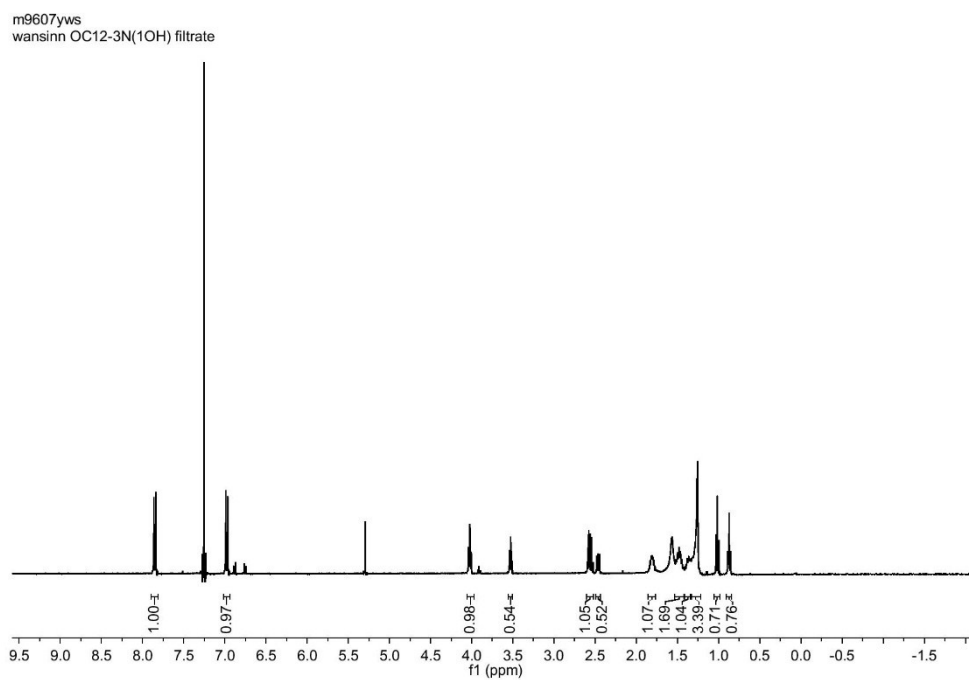

Fig. S15 <sup>1</sup>H NMR graph of compound 18.



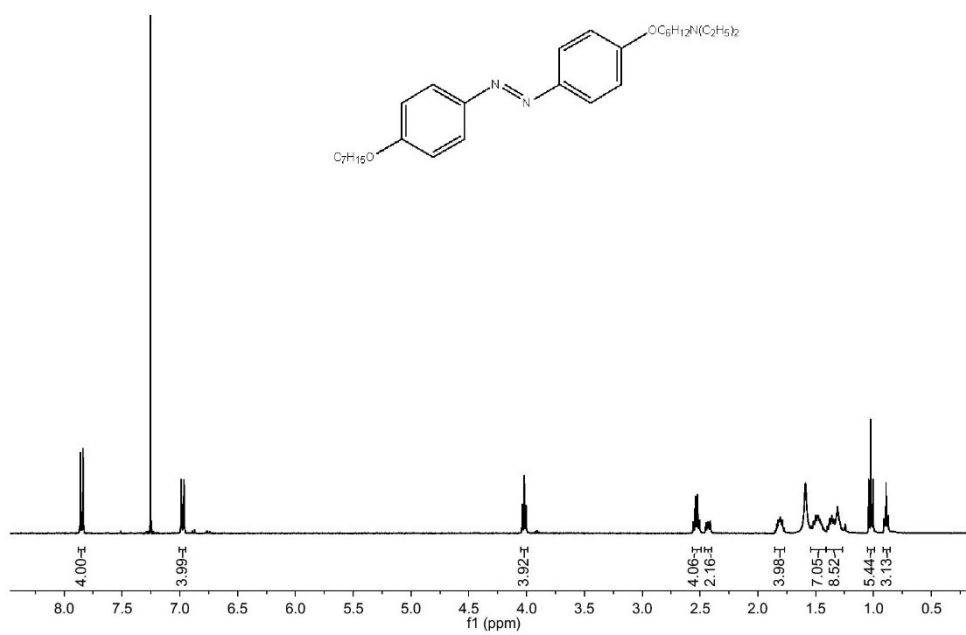

Fig. S16 <sup>1</sup>H NMR graph of compound 19.

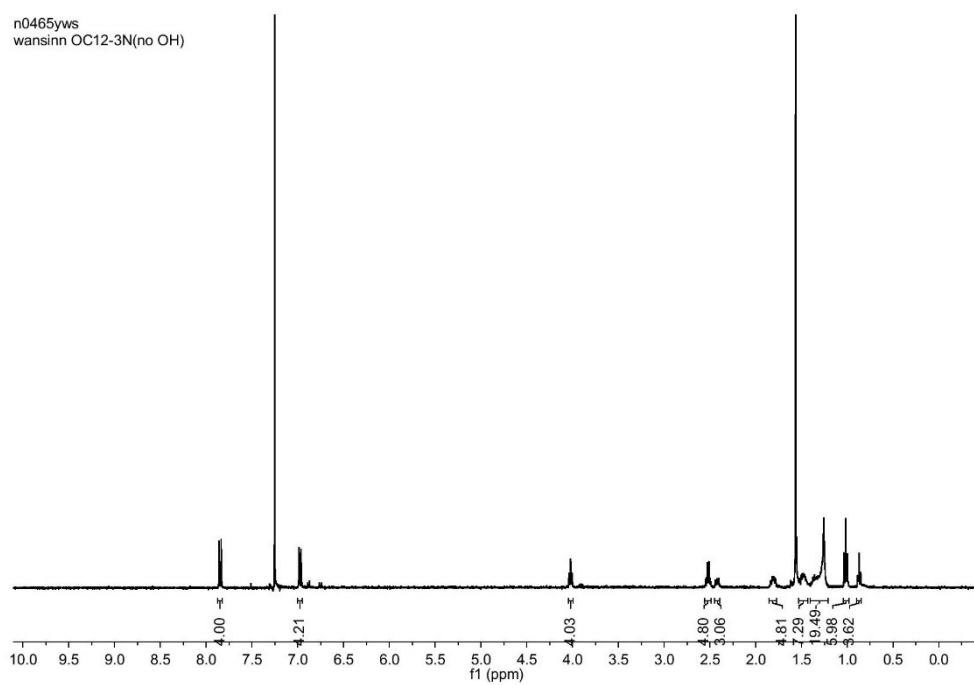

Fig. S17 <sup>1</sup>H NMR graph of compound 21.

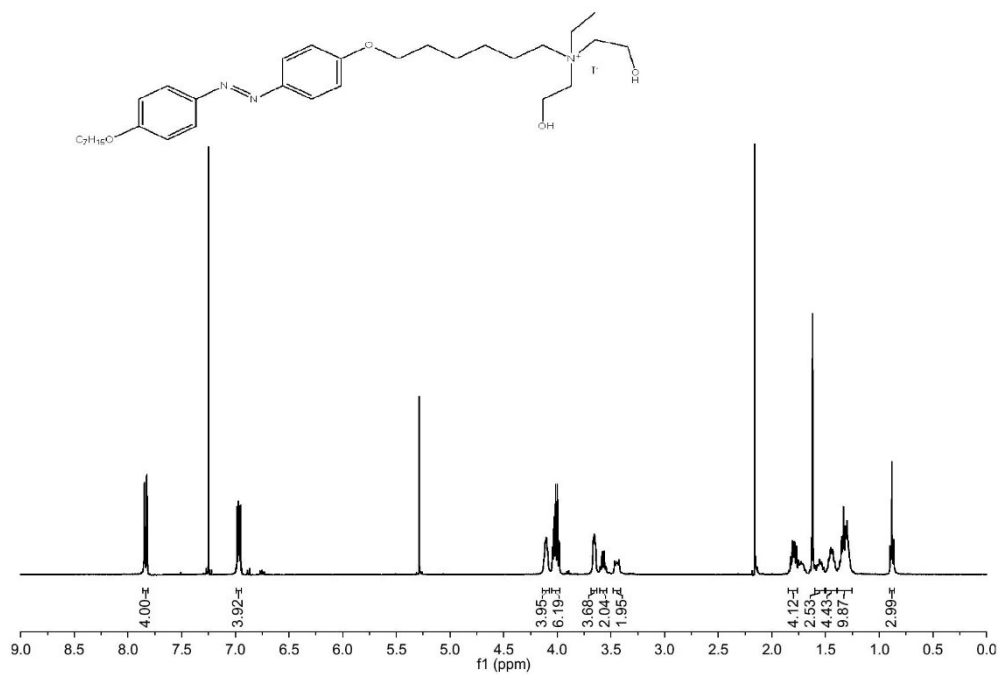

Fig. S18 <sup>1</sup>H NMR graph of compound 22.

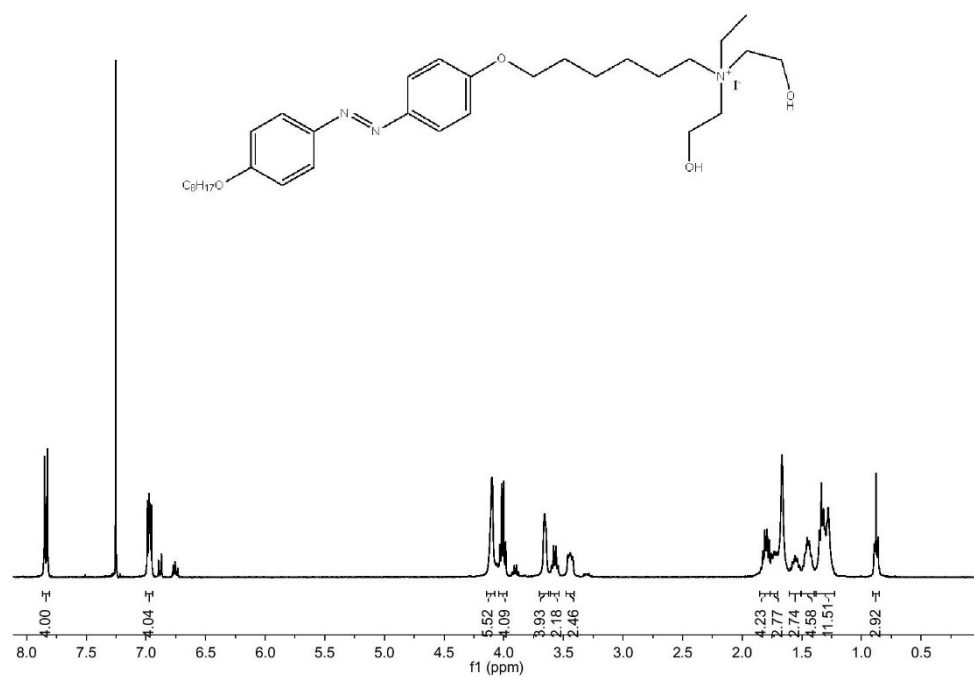

Fig. S19 <sup>1</sup>H NMR graph of compound 23.

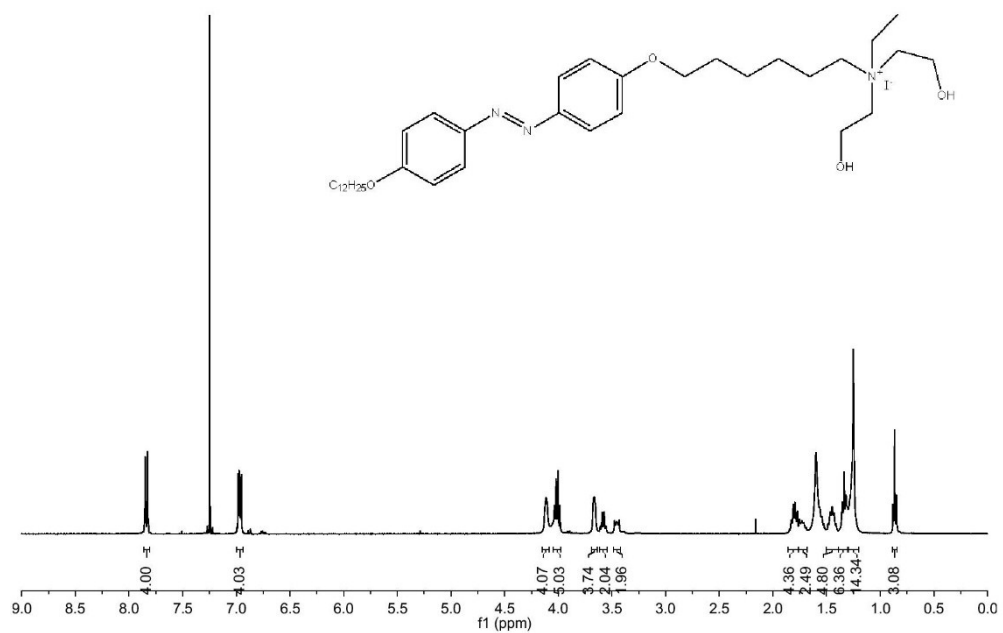

Fig. S20 <sup>1</sup>H NMR graph of compound 24.

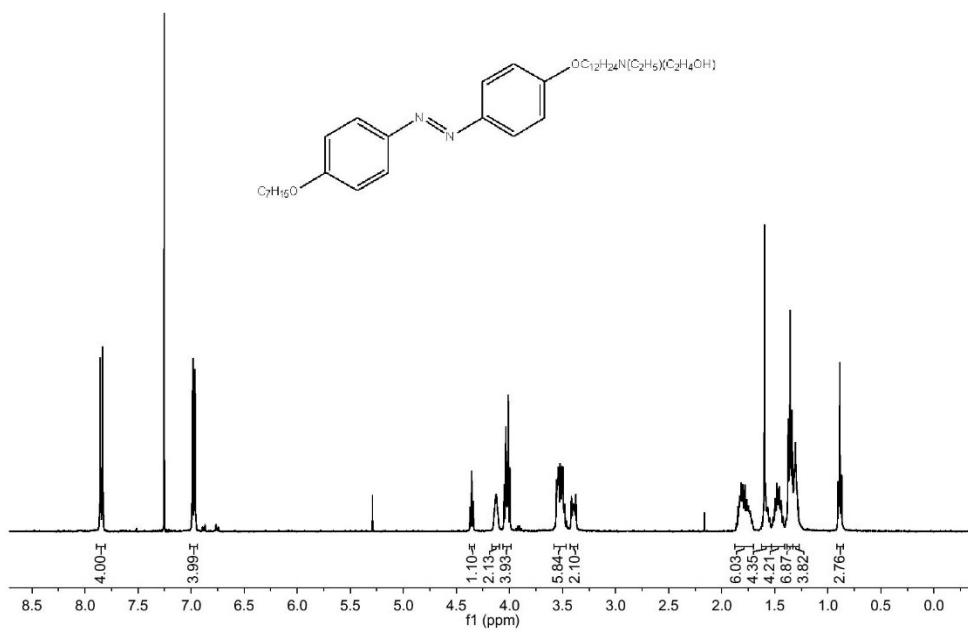

Fig. S21 <sup>1</sup>H NMR graph of compound 25.

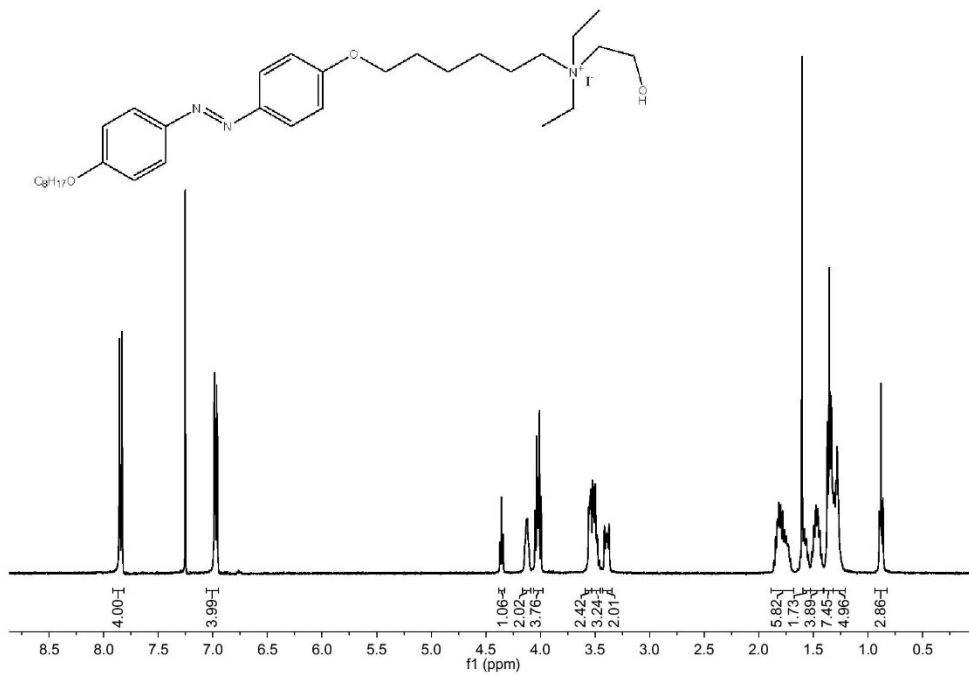

Fig. S22 <sup>1</sup>H NMR graph of compound 26.

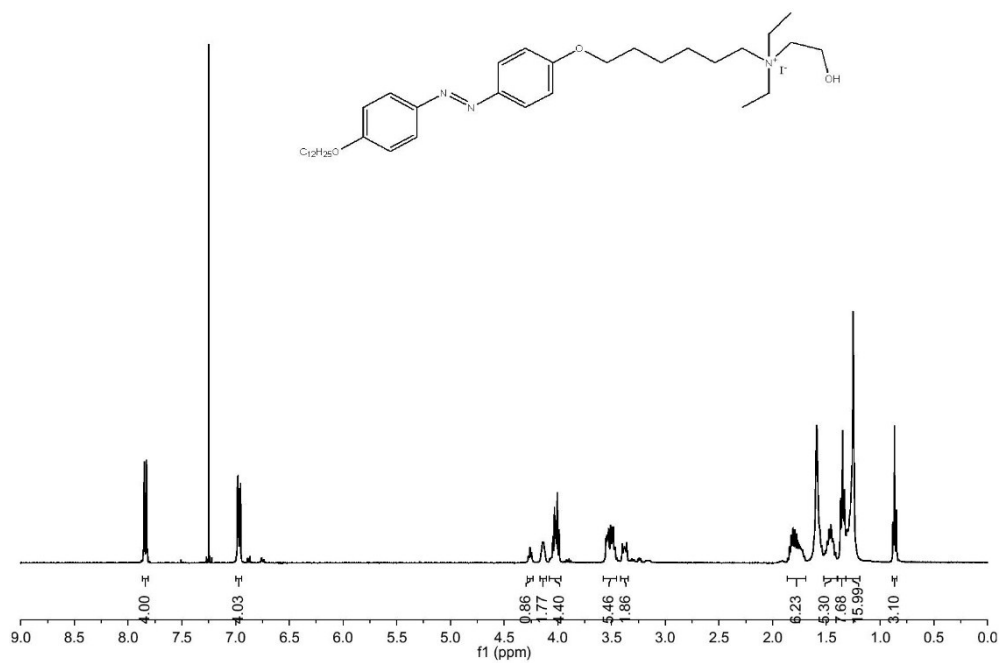

Fig. S23 <sup>1</sup>H NMR graph of compound 27.

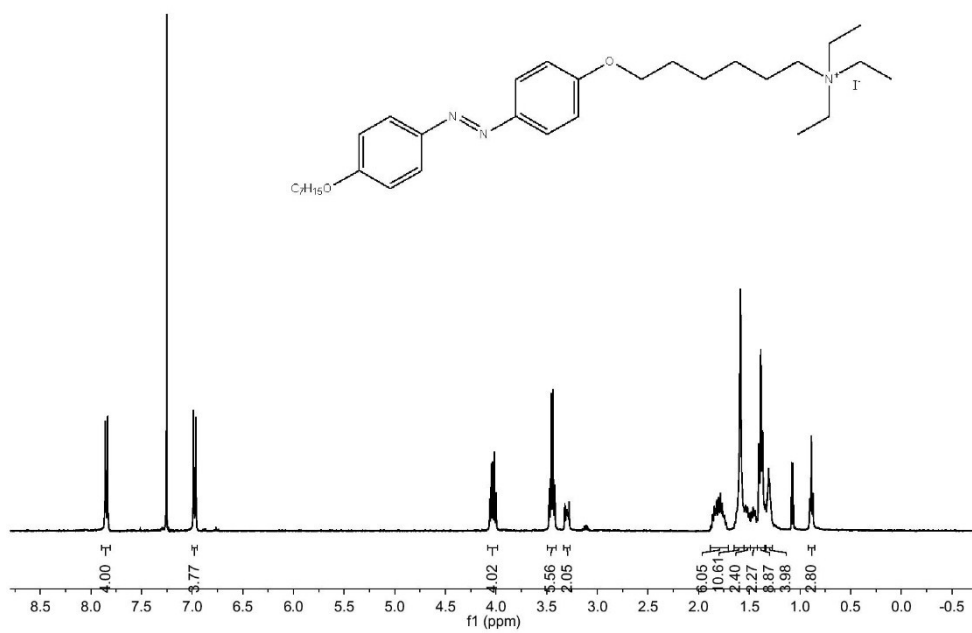

Fig. S24 <sup>1</sup>H NMR graph of compound 28.

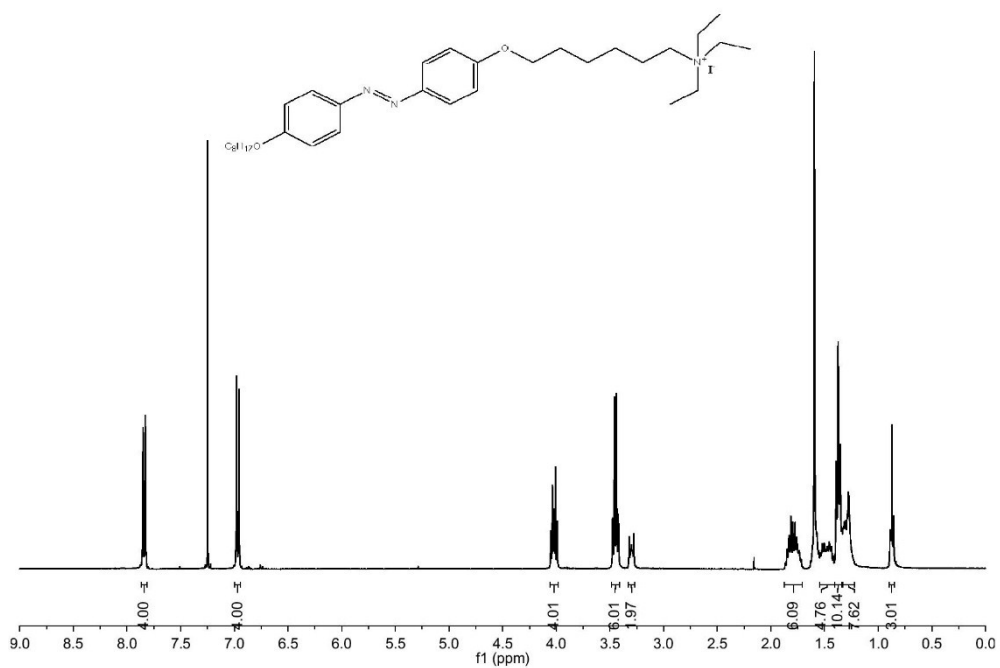

Fig. S25 <sup>1</sup>H NMR graph of compound 29.

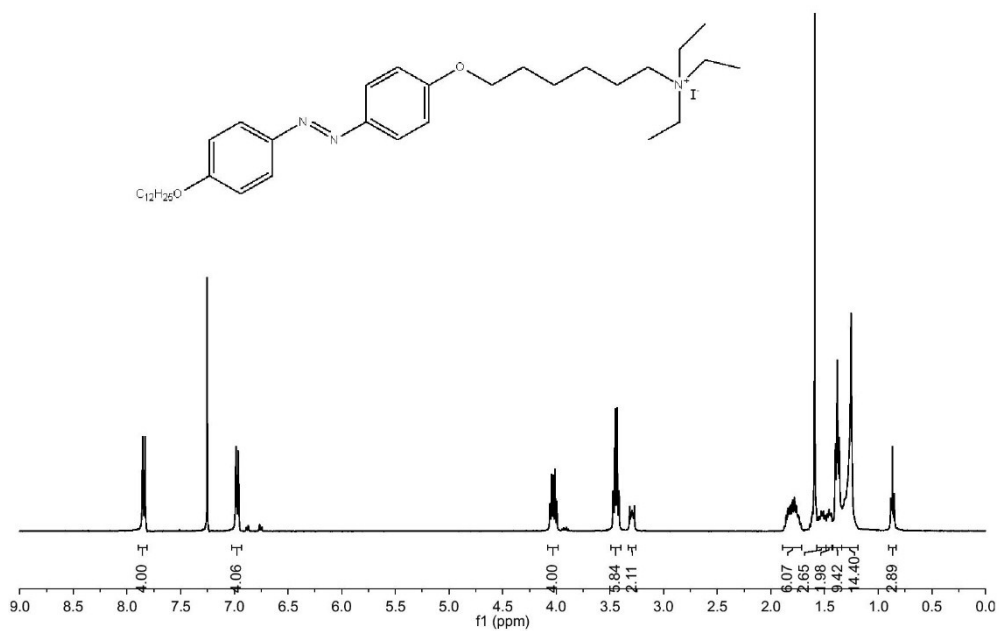

Fig. S26 <sup>1</sup>H NMR graph of compound 30.

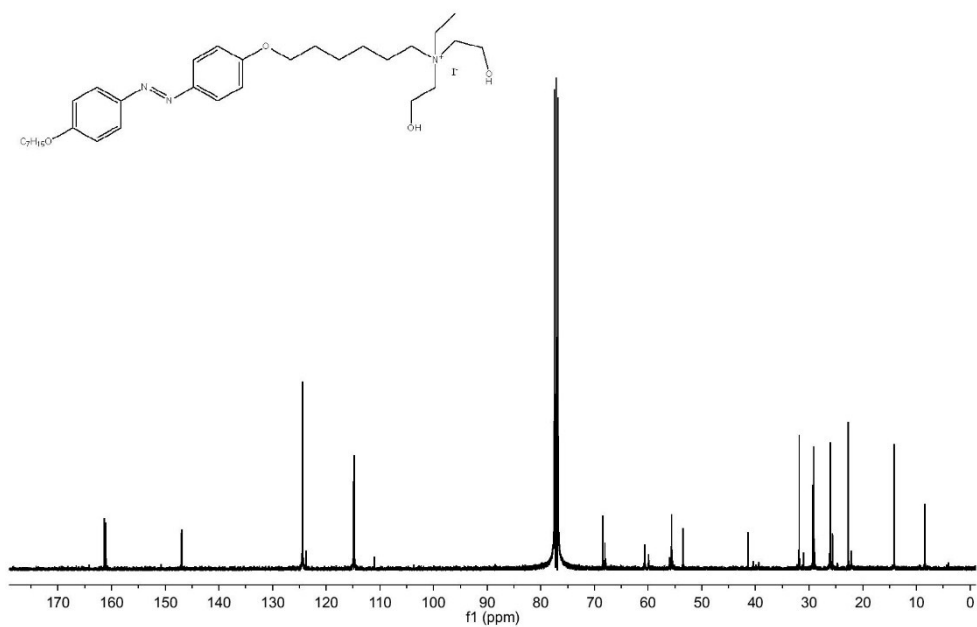

Fig. S27 <sup>13</sup>C NMR graph of compound 22.

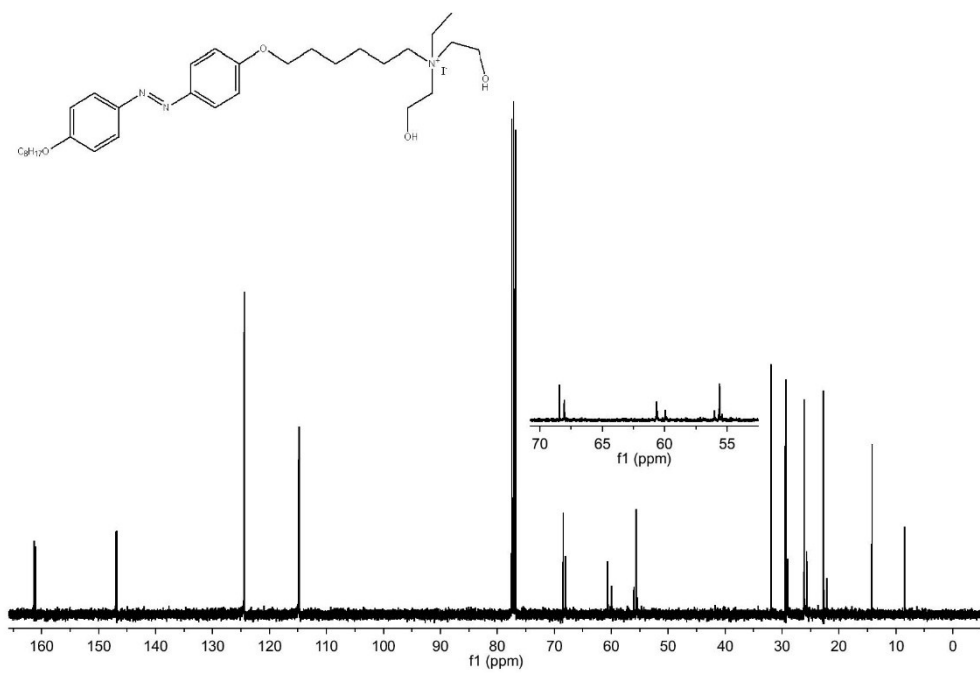

Fig. S28 <sup>13</sup>C NMR graph of compound 23.

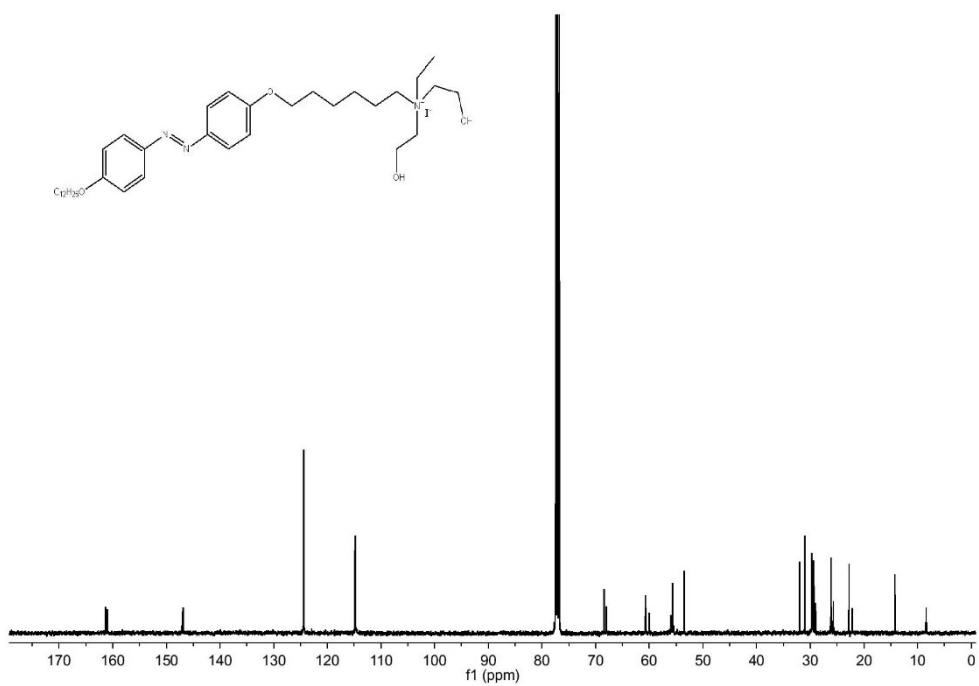

Fig. S29 <sup>13</sup>C NMR graph of compound 24.

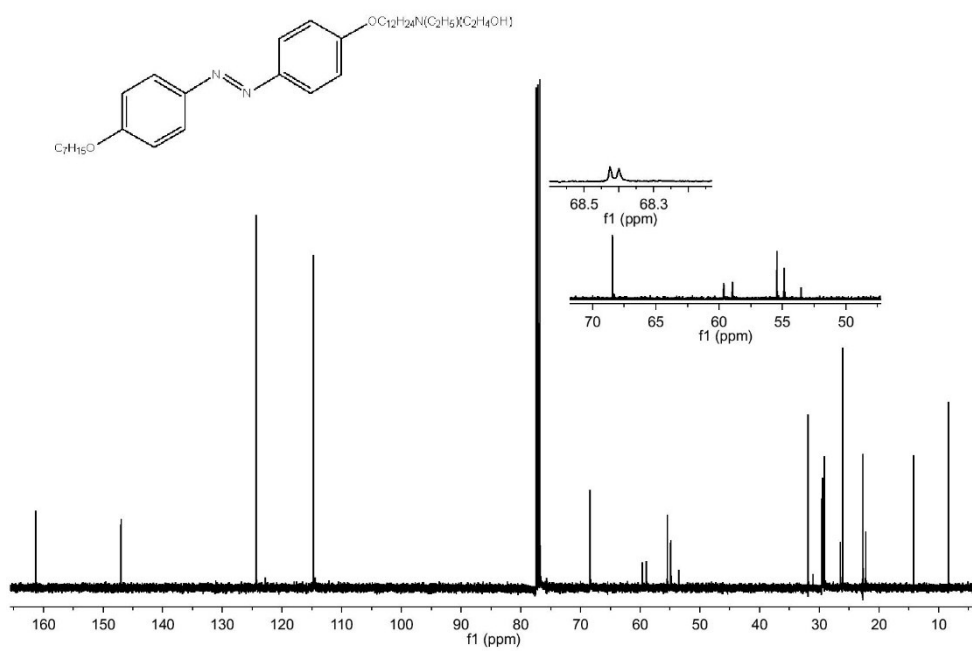

Fig. S30 <sup>13</sup>C NMR graph of compound 25.

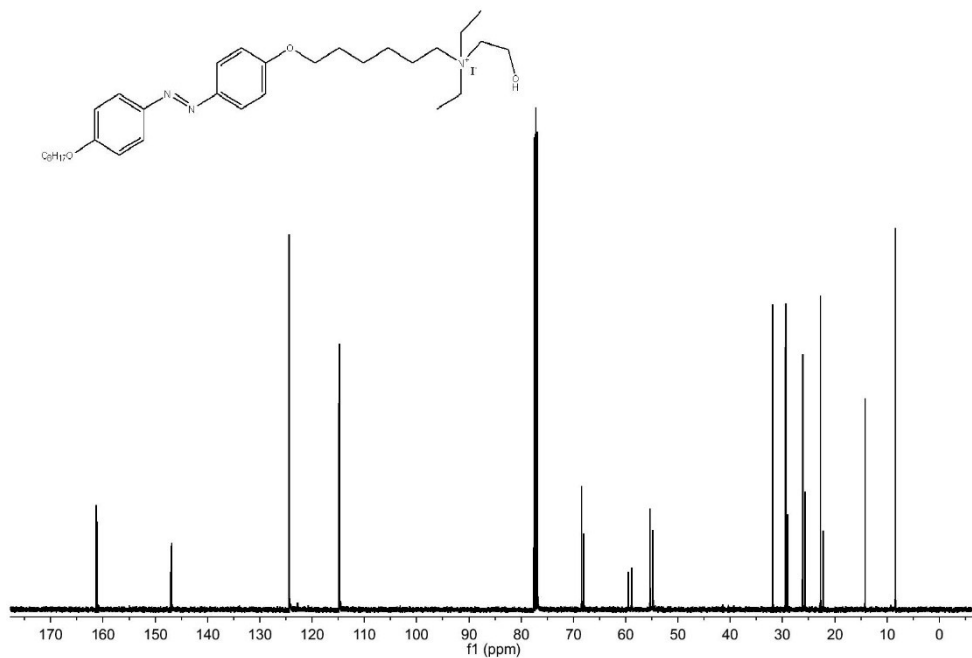

Fig. S31 <sup>13</sup>C NMR graph of compound 26.



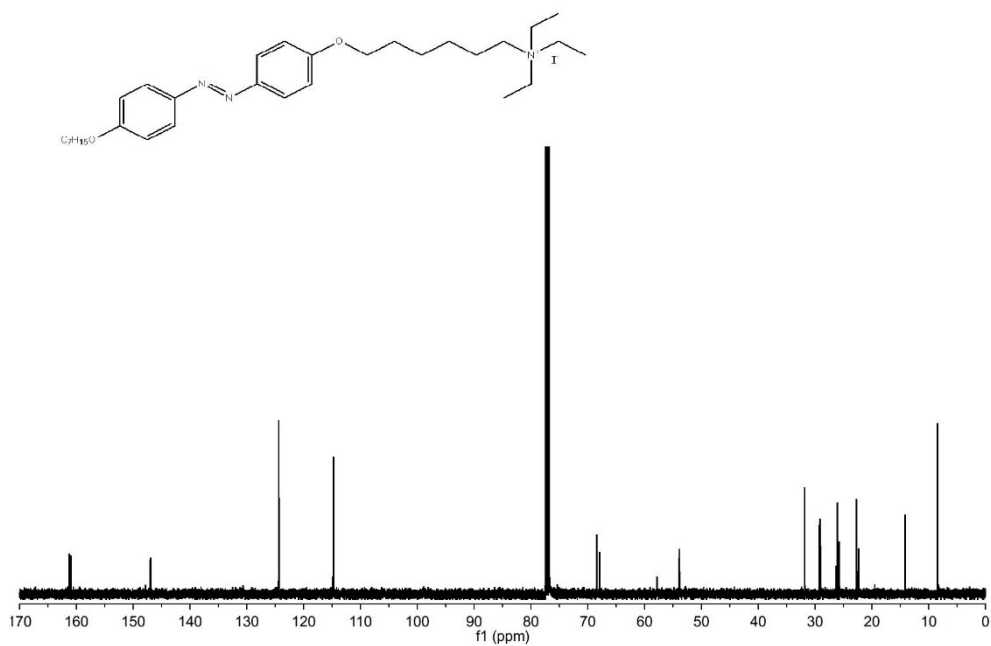

Fig. S32 <sup>13</sup>C NMR graph of compound 28.

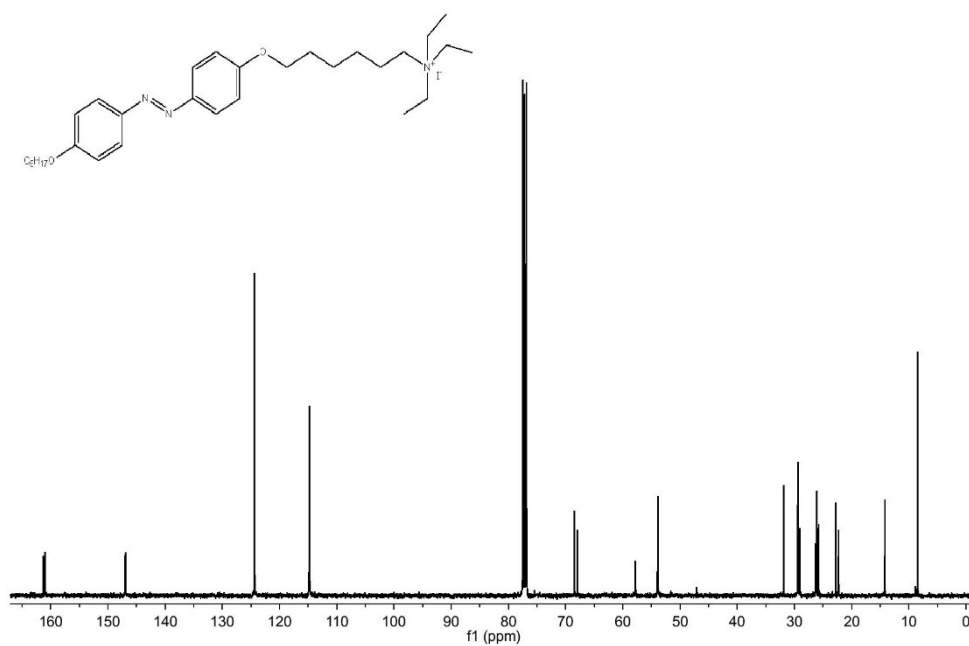

Fig. S33 <sup>13</sup>C NMR graph of compound 29.

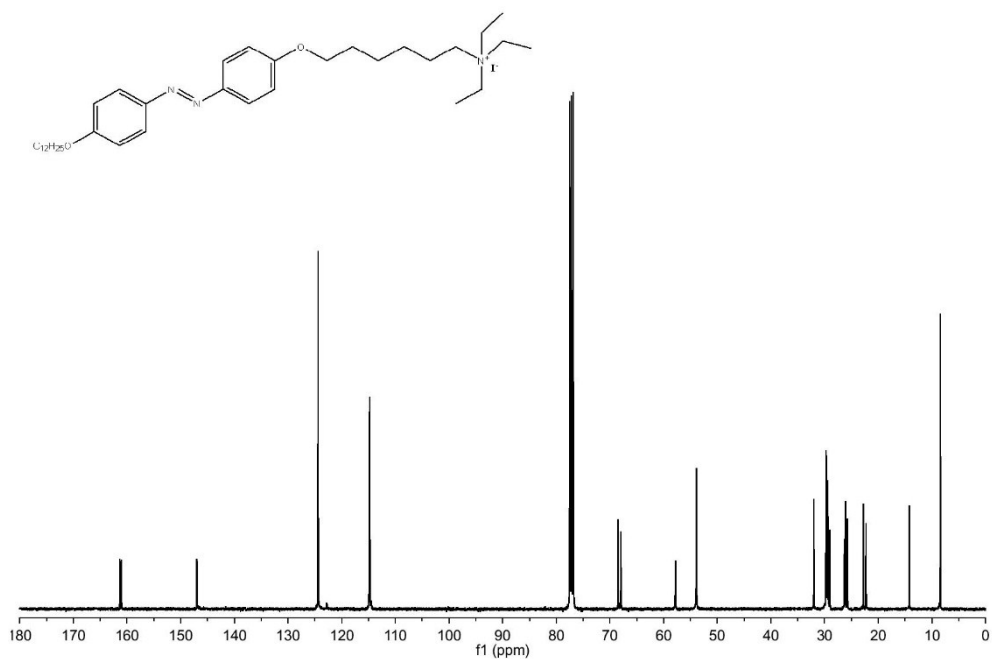

Fig. S34  $^{13}\text{C}$  NMR graph of compound 30.

## 2. DSC thermograms

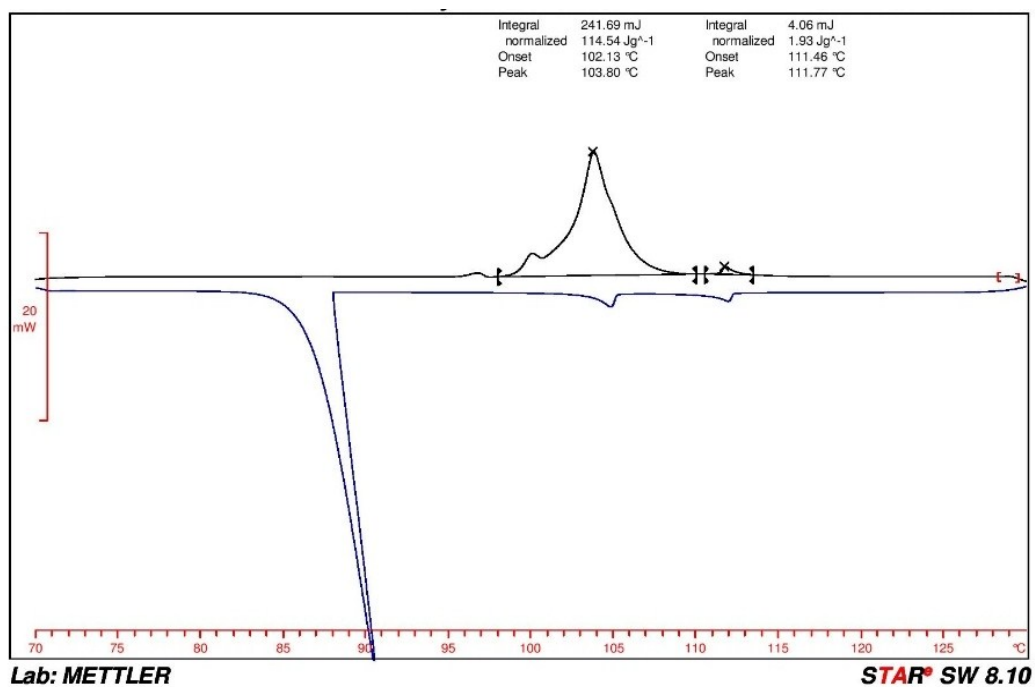

Fig. S35 DSC graph of compound 10.

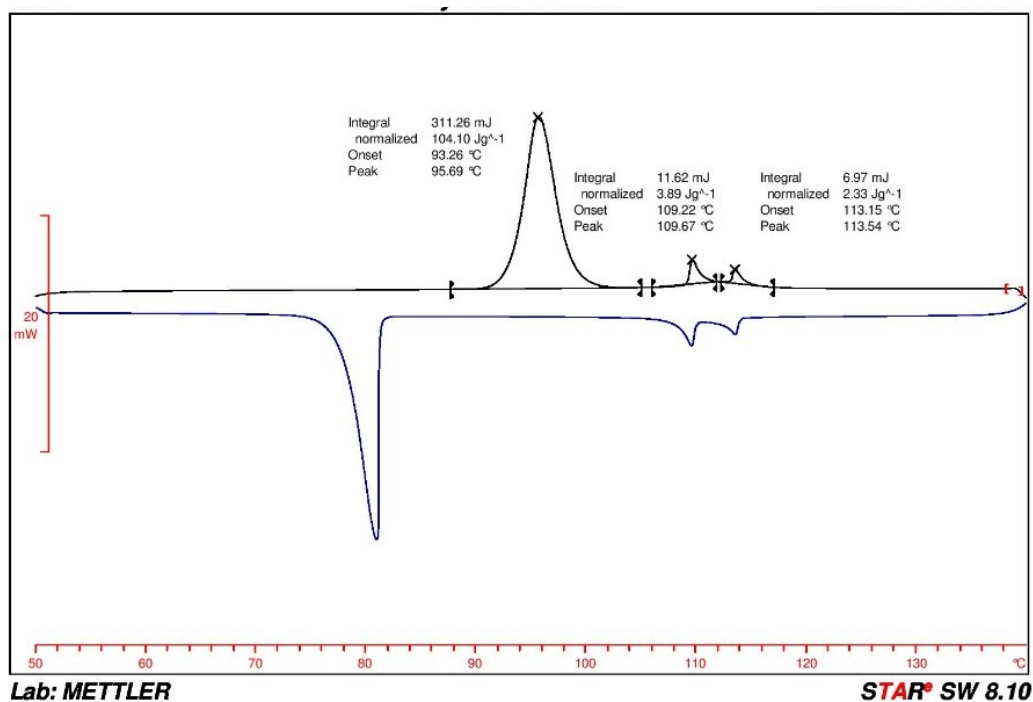

Fig. S36 DSC graph of compound 11.

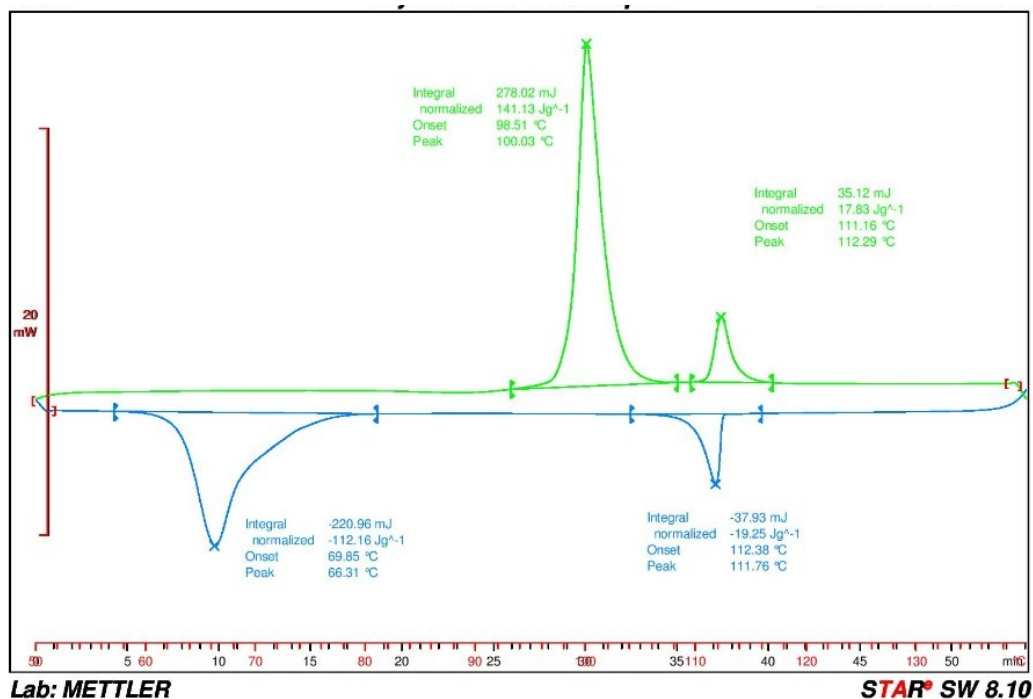

Fig. S37 DSC graph of compound 12.

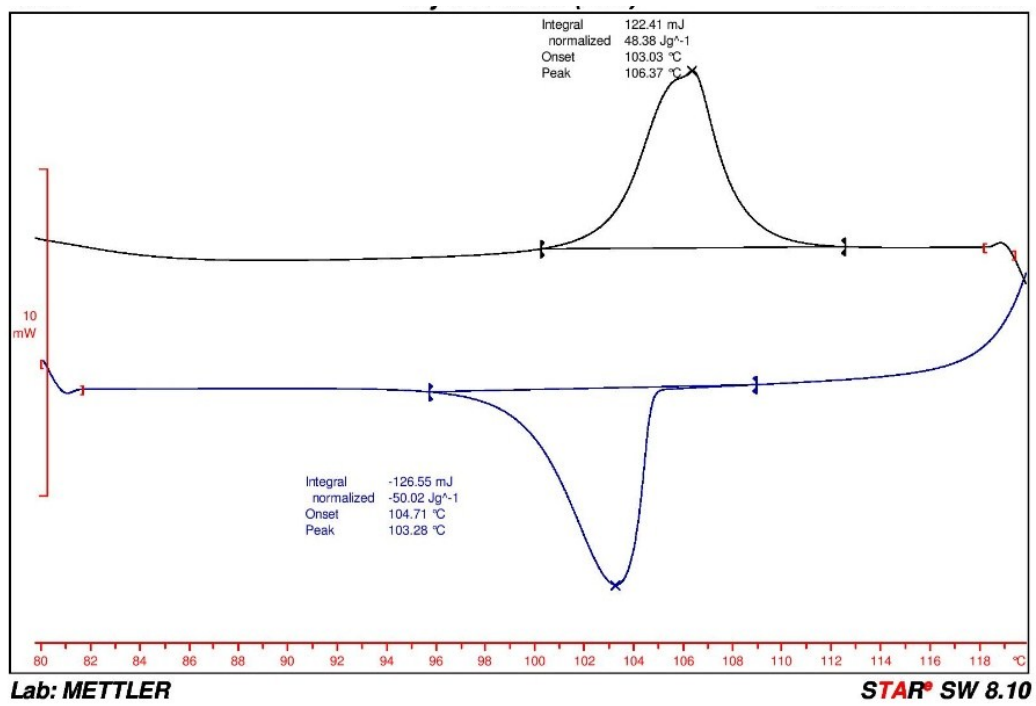

Fig. S38 DSC graph of compound 13.

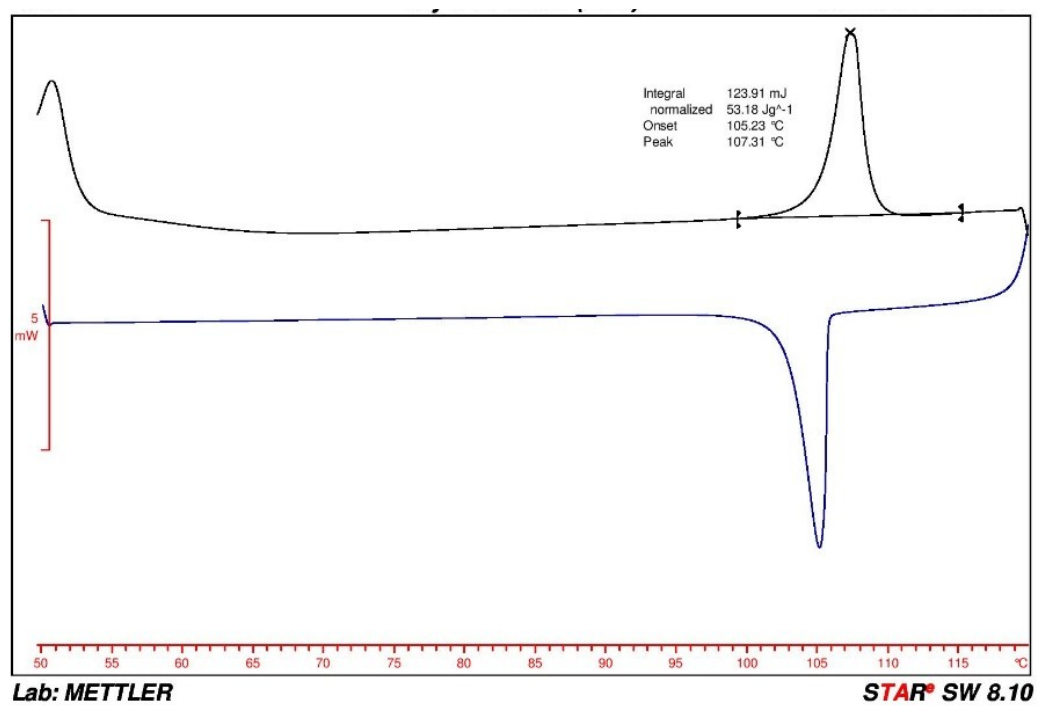

Fig. S39 DSC graph of compound 14.

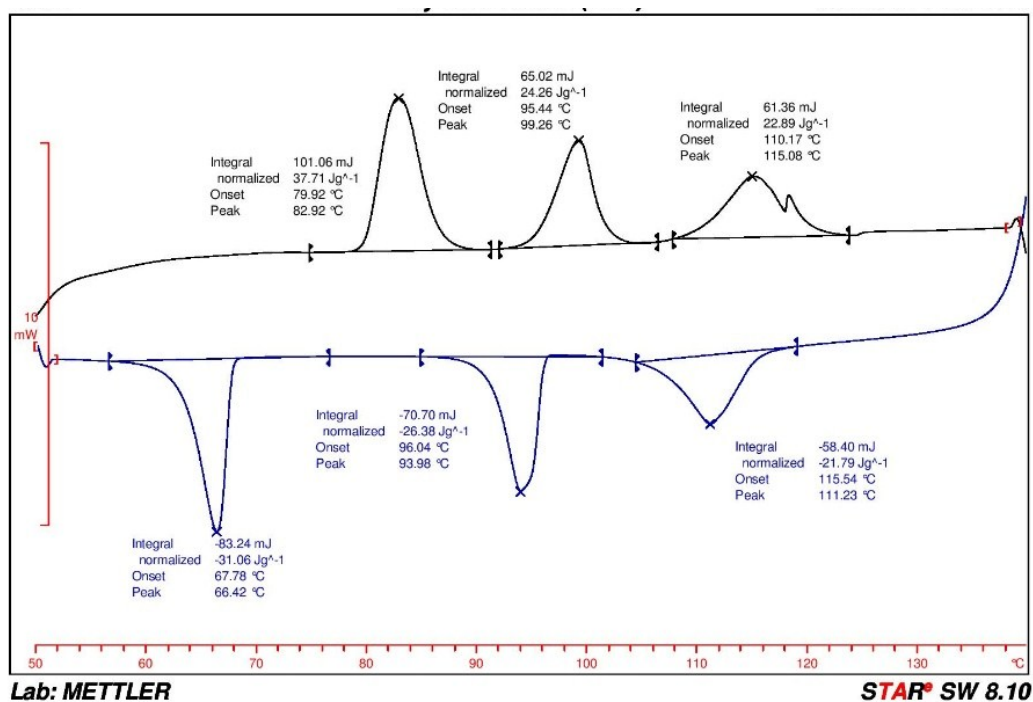

Fig. S40 DSC graph of compound 15.

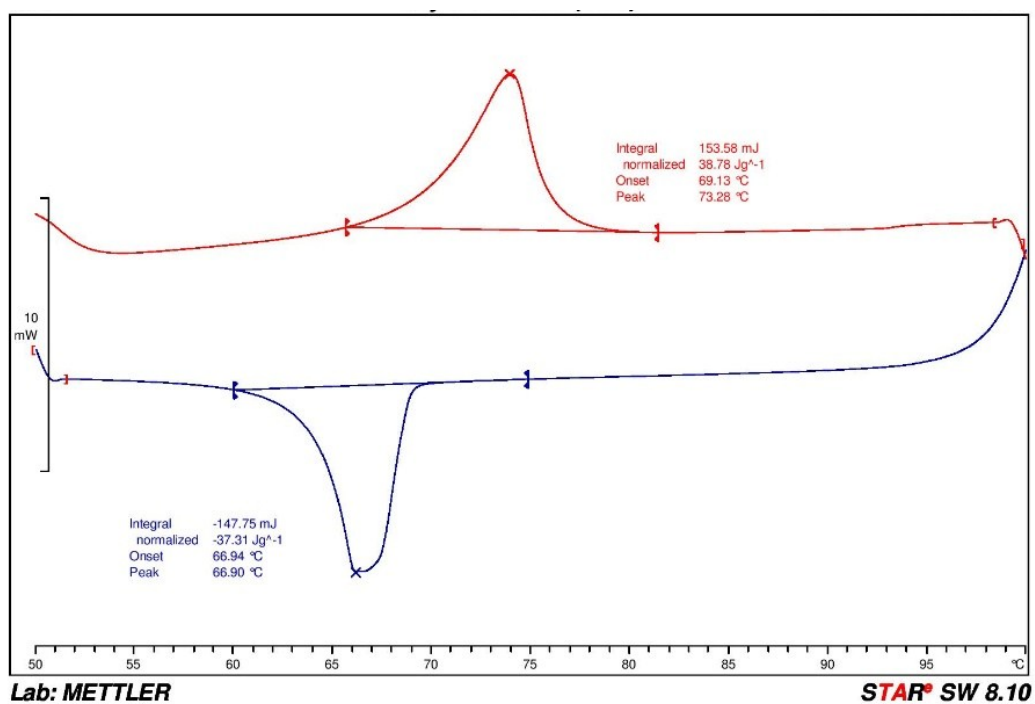

Fig. S41 DSC graph of compound 16.

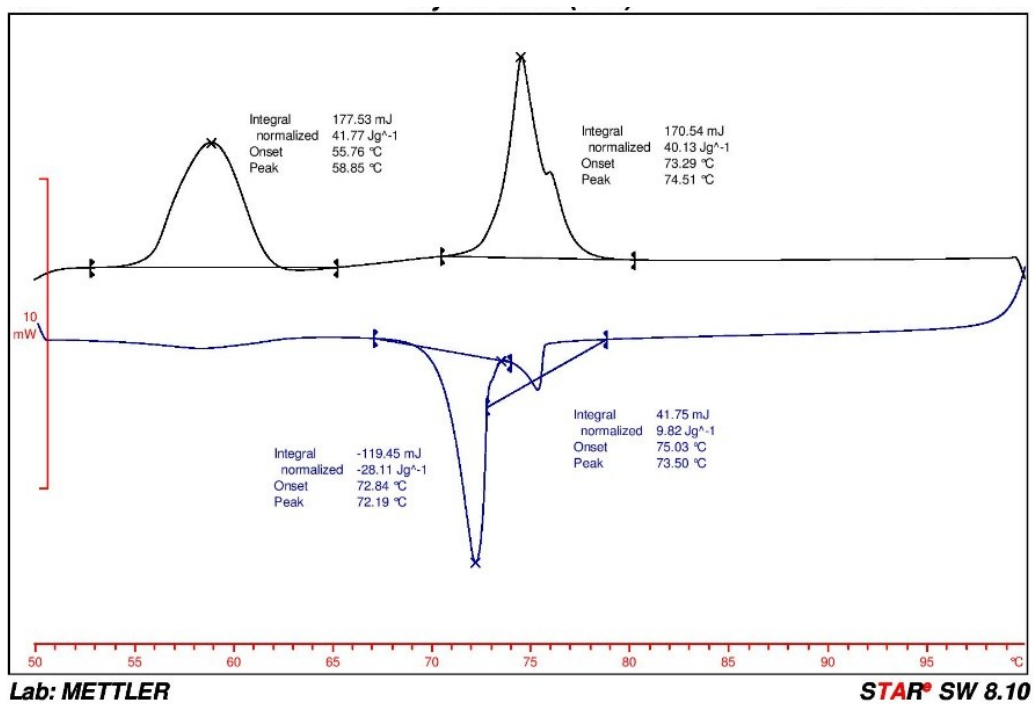

Fig. S42 DSC graph of compound 17.

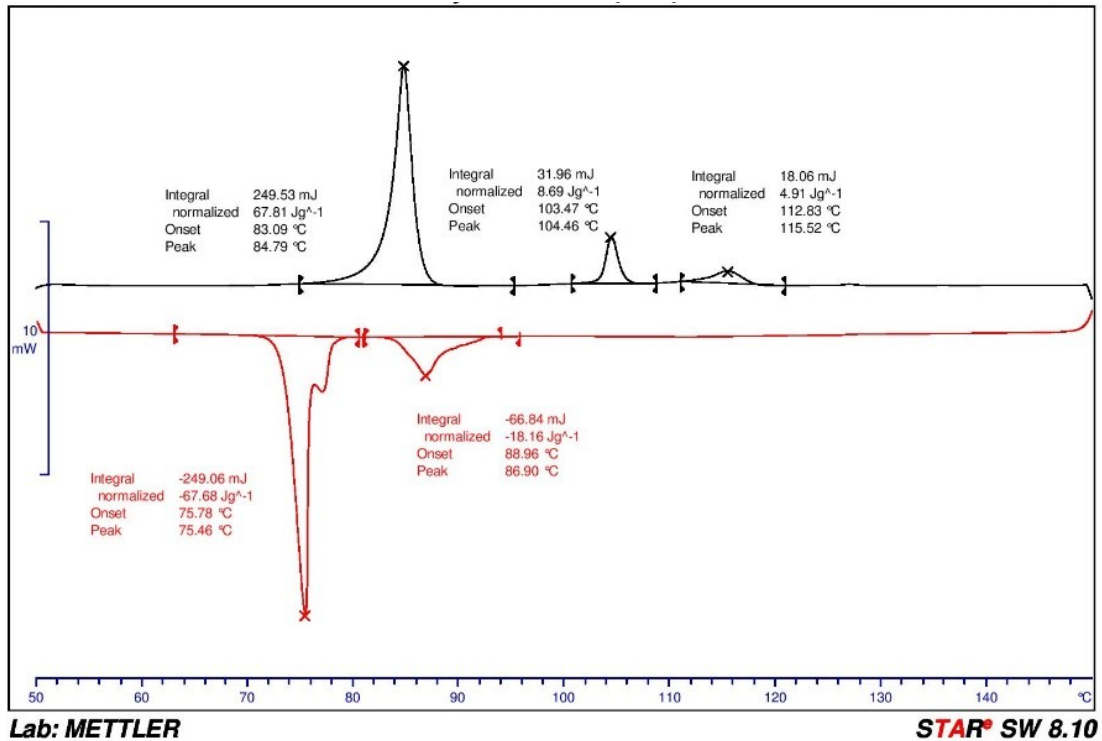

Fig. S43 DSC graph of compound 18.

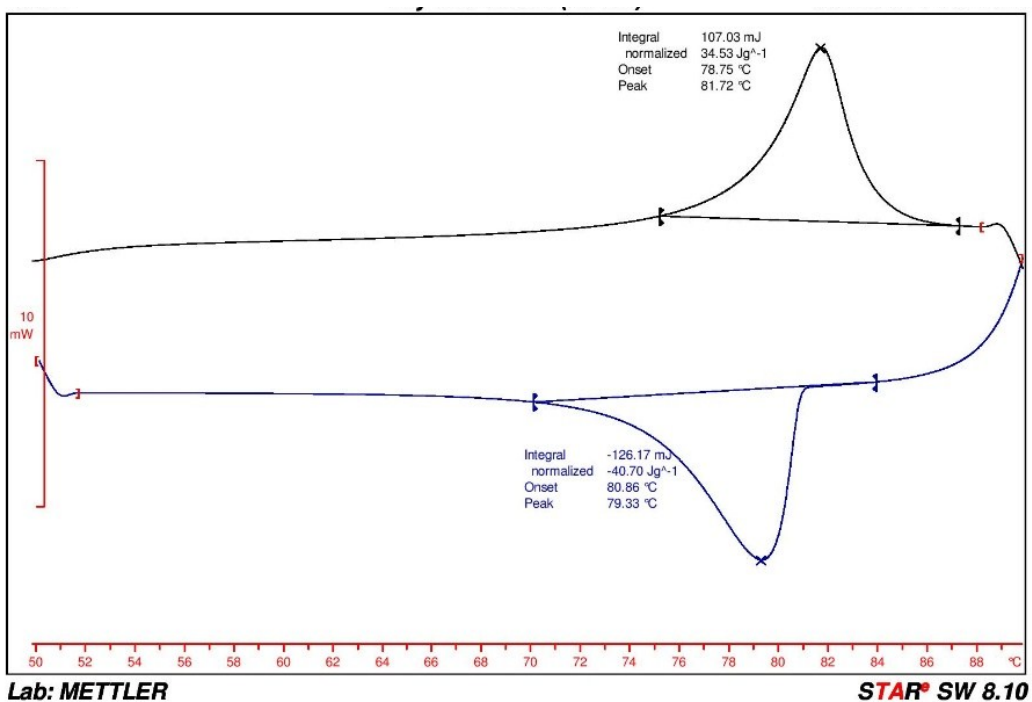

Fig. S44 DSC graph of compound 19.

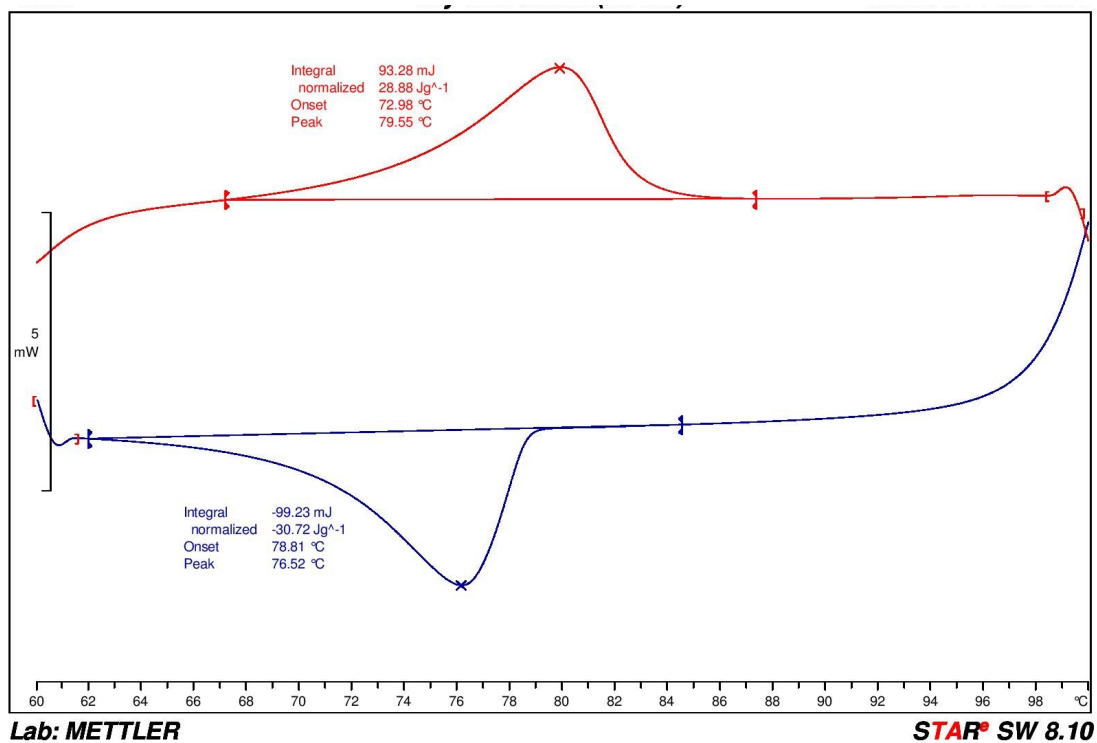

Fig. S45 DSC graph of compound 20.



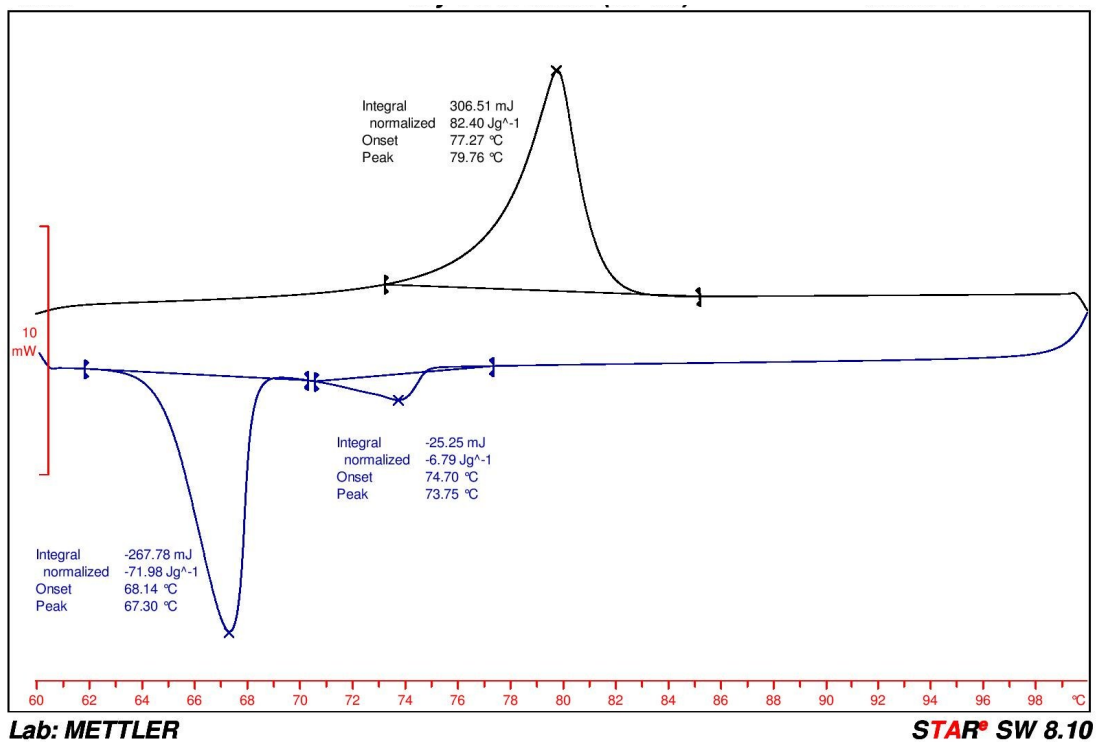

Fig. S46 DSC graph of compound 21.

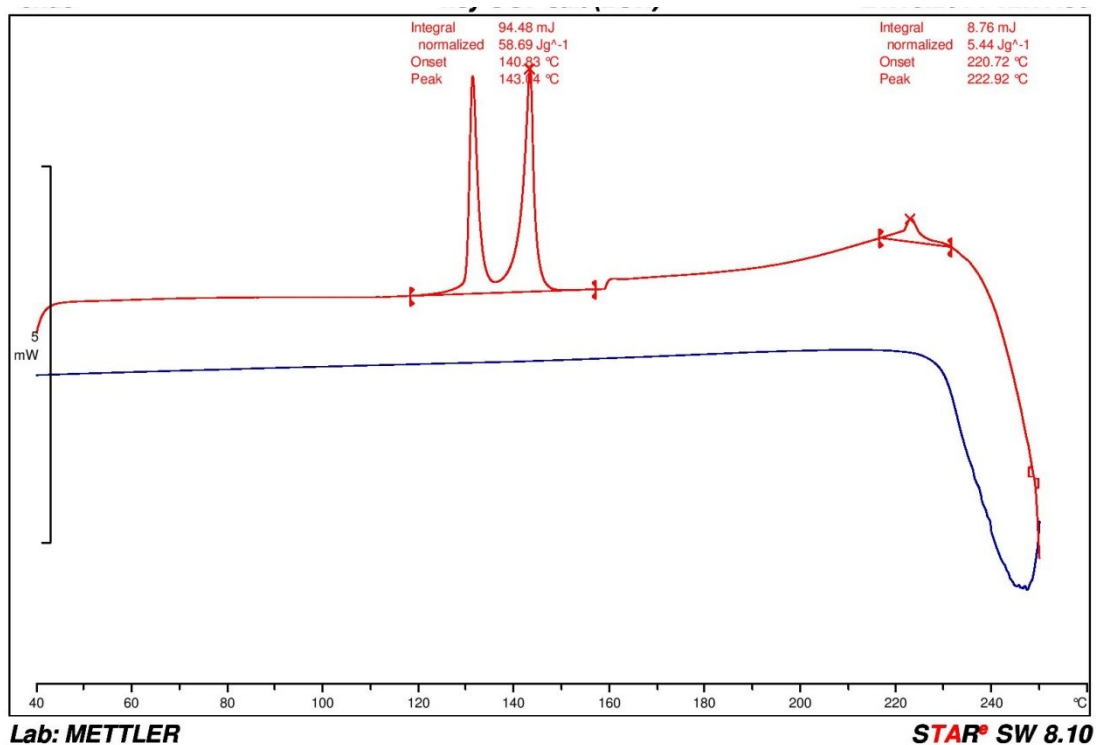

Fig. S47 DSC graph of compound 21.

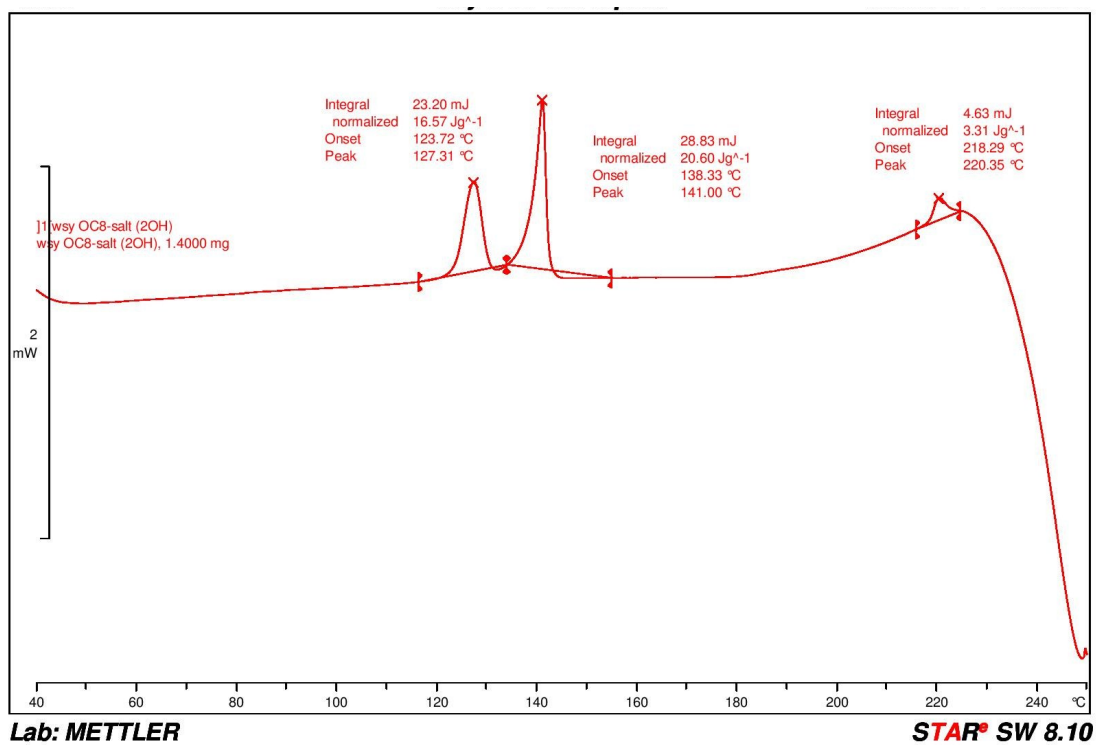

Fig. S48 DSC graph of compound 22.

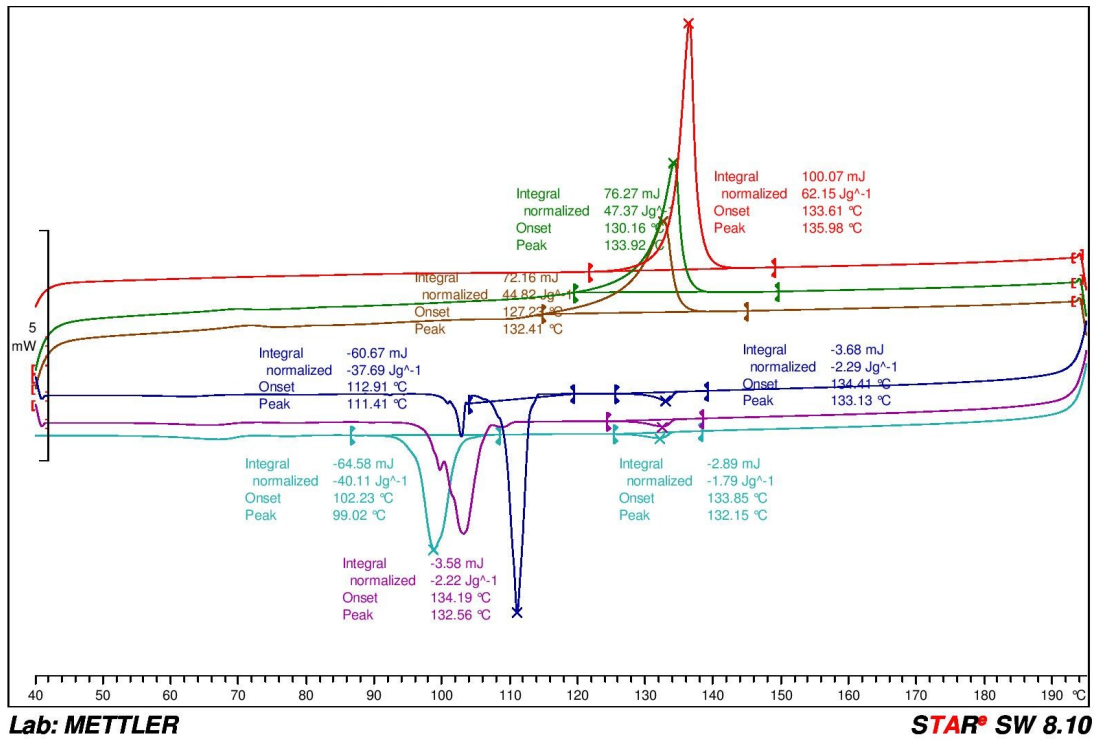

Fig. S49 DSC graph of compound 24.

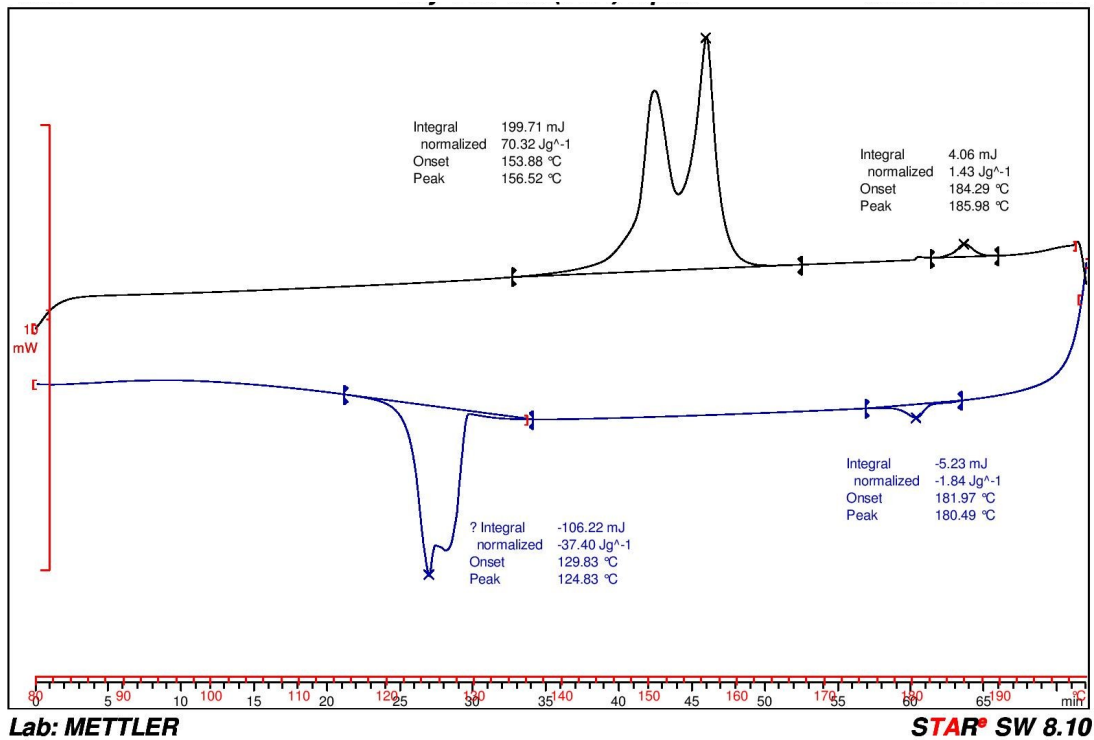

Fig. S50 DSC graph of compound 25.

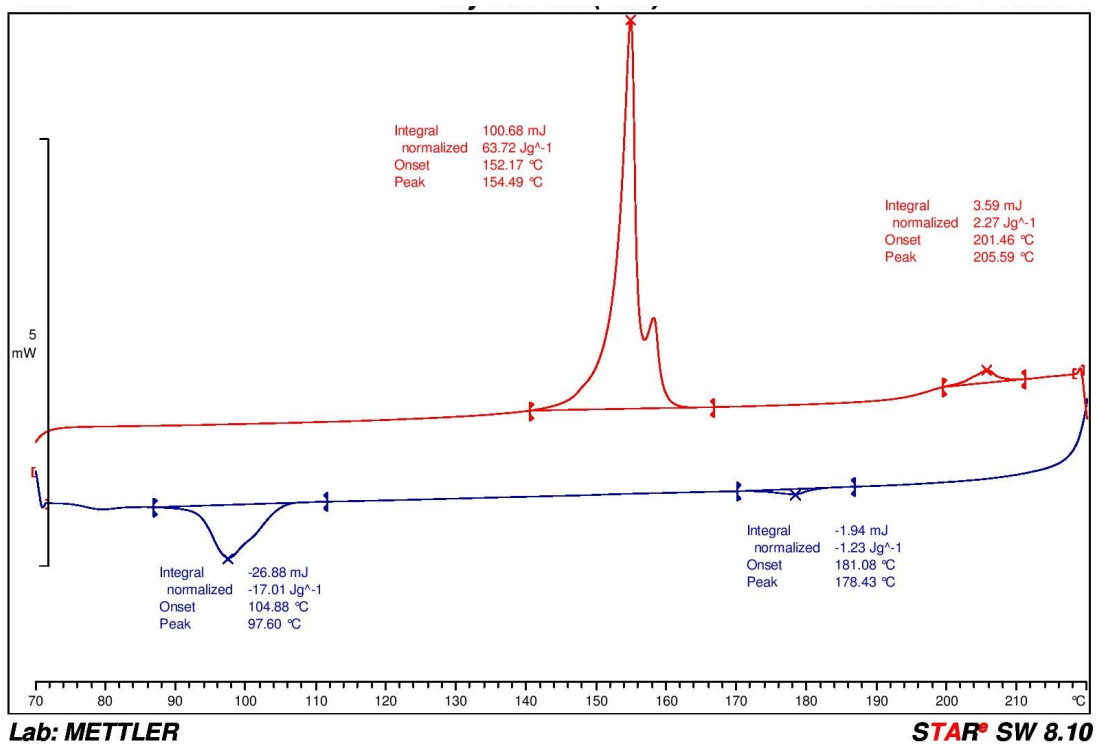

Fig. S51 DSC graph of compound 26.

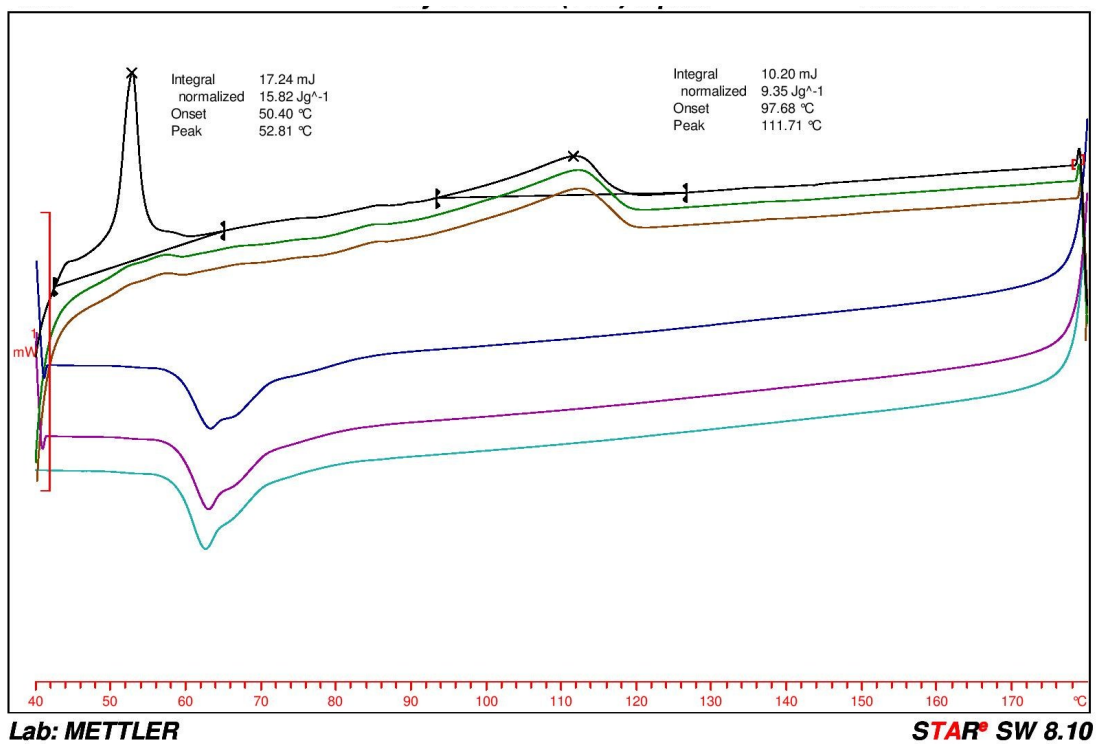

Fig. S52 DSC graph of compound 27.

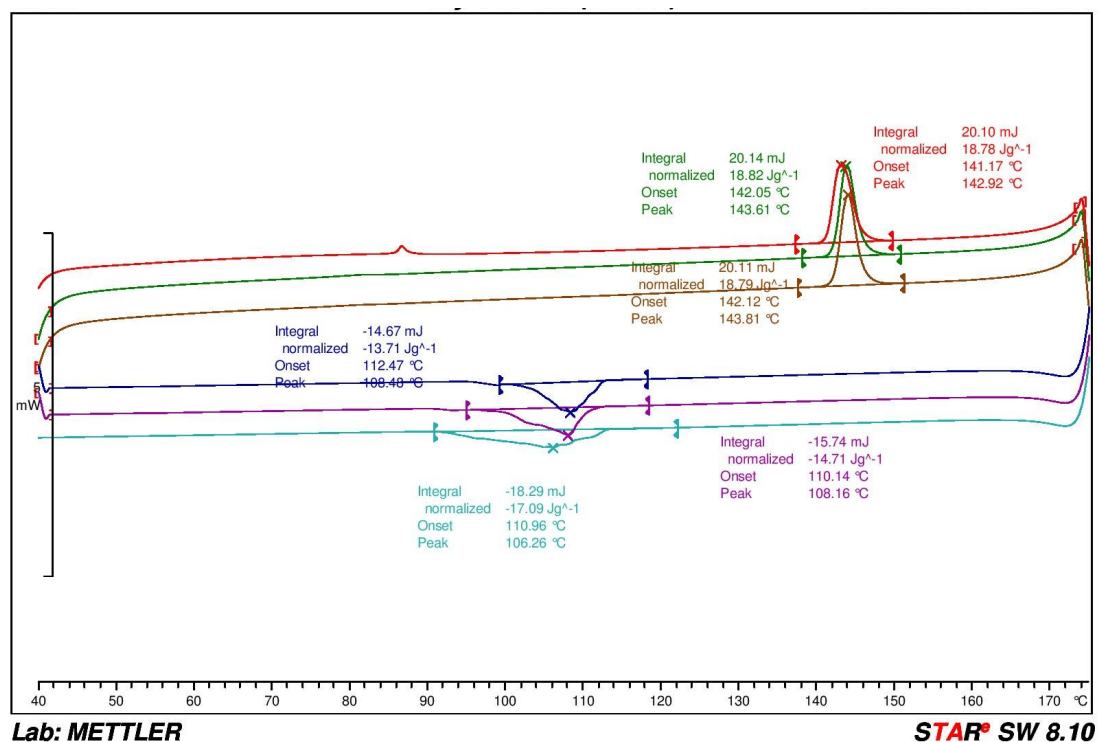

Fig. S53 DSC graph of compound 29.

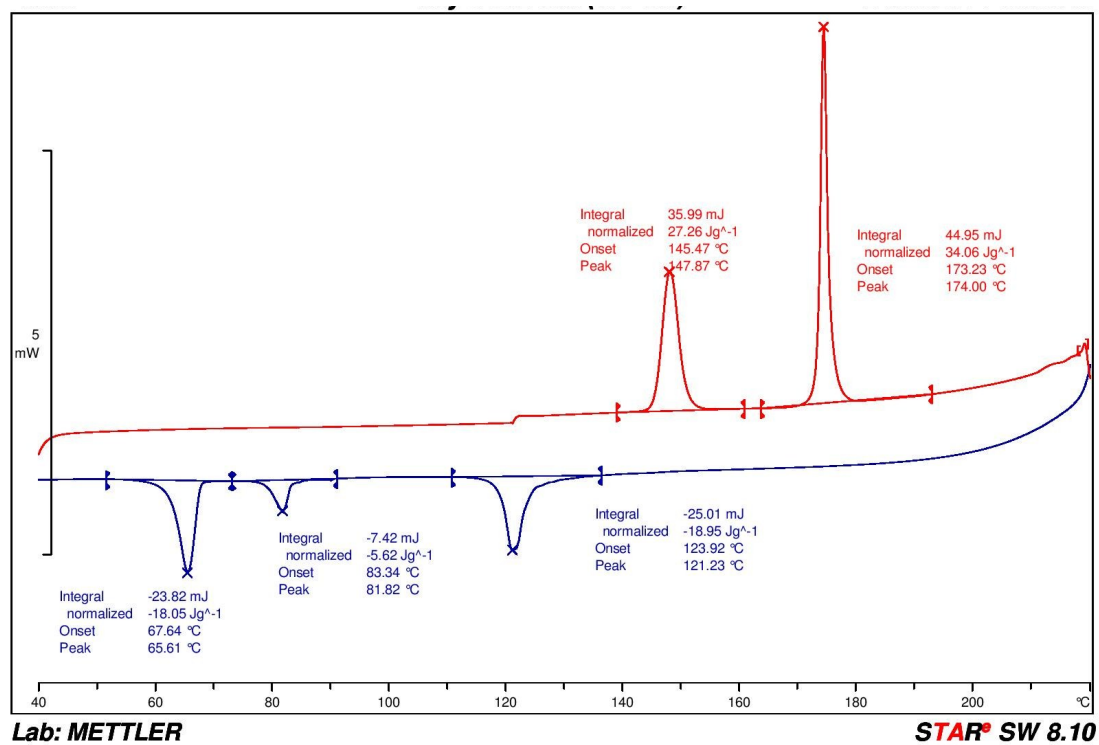

Fig. S54 DSC graph of compound 30.

### 3. FT-IR Graph
